# Supplementary material for: Comparative genomics of the tardigrades Hypsibius dujardini and Ramazzottius varieornatus
Source: PLoS Biol. 2017 Jul 27;15(7):e2002266. doi: 10.1371/journal.pbio.2002266 (PMC5531438; doi:10.1371/journal.pbio.2002266)
Supplement: S2 Data — Supplementary comments on protein families with four-fold overrepresentation in tardigrades. Family OG0000104 had 284 members, 276 of which derived from tardigrades, and was annotated as having a receptor ligand binding domain, but was not otherwise distinguished. OG004022 had 5 members in H. dujardini and 9 members in R. variornatus, but a mode of 1 (and maximum of 4 in Octopus bimaculatus) in other species. It is a member of a deeply conserved, otherwise uncharacterized, transmembrane protein family of unknown function. OG0001636 gathers a deeply conserved ATP-binding cassette family, and while the 27 other species had a mode of 1 (and a maximum of 2), R. varieornatus had 4 and H. dujardini had 9 copies. OG0002927 encodes protein kinases, present in 23 of the 29 species, with 6 in H. dujardini, 5 in R. varieornatus and a mode of 1 elsewhere. OG0004228 is annotated as a relish-like transcription factor, and has 1 copy in the non-tardigrade species (except for two insects with 2) and 5 copies in each tardigrade. OG0001359, with 1 copy in most species, 8 in H. dujardini, 8 in R. varieornatus, and 4 in Solenopsis invictus, is likely to be a SAM-dependent methyltransferase (type 11), possibly involved in coenzyme biosynthesis. OG001949 had 1 copy in most species but 6 in H. dujardini and 4 in R. varieornatus, and is annotated as a RAB GTP hydrolase. OG0003870 was unannotated (containing only matches to domain of unknown function DUF1151), and elevated in R. varieornatus (9 copies) compared to other species (mode of 1; H. dujardini had 2). The three clusters with depletion in the tardigrades were OG0000604, encoding an exoribonuclease (1 copy in each tardigrade, but an average of three copies in the other 27 species), OG0000950, a 3'5'-cyclic nucleotide phosphodiesterase (1 in tardigrades versus 2.3 elsewhere) and OG00001138, an EF-hand protein (1 in tardigrades versus 2 elsewhere). In the Excel-format file the columns are as follows: (1) #cluster_id: protein family ide [file pbio.2002266.s019.xlsx]

## Sheet: Tardigrada.count_enriched.clust
#cluster_id	cluster_status	cluster_type	cluster_protein_count	cluster_proteome_count	Tardigrade_protein_count	Tardigrade_mean_count	non_Tardigrade_mean_count	representation	log2_mean(Tardigrade/others)	mwu_pvalue(Tardigrade vs. others)	Tardigrade_proteome_coverage	Tardigrade_proteomes_present_count	Tardigrade_proteomes_present	GO	IPR	Pfam	SignalP_EUK
OG0000104	present	shared	284	10	276	138	1	enriched	7.10852	0.00518861	1	2	HDUJA,RVARI	GO:0006468:6;GO:0016849:6;GO:0004672:6;GO:0035556:6;GO:0009190:6;GO:0005524:2;GO:0016020:1;GO:0016757:1	IPR001828:208;IPR001849:7;IPR001054:6;IPR001245:4;IPR000719:2;IPR025331:1;IPR003378:1	PF01094:208;PF00169:7;PF00211:6;PF07714:4;PF00069:2;PF02434:1;PF14021:1	SignalP-noTM:86;SignalP-TM:9
OG0000684	present	shared	79	28	41	20.5	1.46154	enriched	3.81006	0.00771992	1	2	HDUJA,RVARI	N/A	IPR028073:37;IPR028074:29;IPR020683:1;IPR000408:1	PF14727:37;PF14728:29;PF12796:1;PF00415:1	SignalP-noTM:18;SignalP-TM:1
OG0004022	present	shared	31	16	14	7	1.21429	enriched	2.52725	0.00166452	1	2	HDUJA,RVARI	N/A	IPR032776:32	PF14997:32	N/A
OG0001636	present	shared	45	29	13	6.5	1.18519	enriched	2.45533	0.00228174	1	2	HDUJA,RVARI	GO:0005524:44;GO:0016021:1;GO:0055085:1	IPR003959:44;IPR014851:40;IPR011701:1	PF00004:44;PF08740:40;PF07690:1	N/A
OG0002927	present	shared	34	23	11	5.5	1.09524	enriched	2.32819	0.000708143	1	2	HDUJA,RVARI	GO:0006468:33;GO:0004672:33;GO:0005524:33;GO:0005576:1;GO:0008061:1;GO:0006030:1	IPR000719:37;IPR002557:1	PF00069:37;PF01607:1	N/A
OG0003870	present	shared	31	19	11	5.5	1.17647	enriched	2.22497	0.00960954	1	2	HDUJA,RVARI	N/A	IPR009533:21	PF06625:21	SignalP-noTM:1
OG0004228	present	shared	30	20	10	5	1.11111	enriched	2.16993	0.00158484	1	2	HDUJA,RVARI	GO:0003700:25;GO:0006355:25;GO:0003677:25;GO:0003676:1;GO:0006397:1	IPR011539:25;IPR032397:24;IPR002181:1;IPR000504:1;IPR002483:1	PF00554:25;PF16179:24;PF00147:1;PF00076:1;PF01480:1	N/A
OG0001359	present	shared	51	28	13	6.5	1.46154	enriched	2.15295	0.00427357	1	2	HDUJA,RVARI	GO:0008152:21;GO:0008168:21;GO:0005975:1;GO:0016853:1;GO:0008138:1;GO:0006470:1	IPR013216:21;IPR003500:1;IPR000340:1	PF13489:26;PF08241:21;PF00782:1;PF02502:1;PF13649:1	SignalP-noTM:2
OG0001949	present	shared	41	28	10	5	1.19231	enriched	2.06817	0.00151325	1	2	HDUJA,RVARI	GO:0007264:41;GO:0005525:41	IPR001806:42	PF00071:42	N/A
OG0001437	present	shared	49	29	11	5.5	1.40741	enriched	1.96639	0.00706536	1	2	HDUJA,RVARI	GO:0003824:30;GO:0035091:25	IPR001736:35;IPR001683:26;IPR025202:25;IPR010623:1;IPR001849:1;IPR009612:1	PF00614:35;PF00787:26;PF13091:25;PF06744:1;PF00169:1;PF06761:1	N/A
OG0001826	present	shared	42	25	10	5	1.3913	enriched	1.84549	0.00761729	1	2	HDUJA,RVARI	GO:0016020:42;GO:0016757:42;GO:0003700:1;GO:0005634:1;GO:0006355:1;GO:0008270:1	IPR003378:44;IPR004092:3;IPR002515:1	PF02434:44;PF02820:3;PF01530:1	SignalP-noTM:5;SignalP-TM:1
OG0002420	present	shared	37	28	8	4	1.11538	enriched	1.84246	0.000647139	1	2	HDUJA,RVARI	N/A	IPR000608:36	PF00179:36	N/A
OG0002106	present	shared	39	29	8	4	1.14815	enriched	1.80069	0.00124372	1	2	HDUJA,RVARI	GO:0006904:34;GO:0000145:34	IPR007225:36;IPR024602:1	PF04091:36;PF06148:1;PF08700:1	N/A
OG0002495	present	shared	36	27	7	3.5	1.16	enriched	1.59323	0.0017783	1	2	HDUJA,RVARI	GO:0005515:31;GO:0008270:21;GO:0005622:21;GO:0046872:6	IPR001258:54;IPR000315:22;IPR027370:8;IPR018957:6;IPR001841:1	PF01436:54;PF00643:22;PF13445:8;PF00097:6;PF08700:1;PF14634:1	SignalP-noTM:1
OG0001683	present	shared	44	29	8	4	1.33333	enriched	1.58496	0.0052144	1	2	HDUJA,RVARI	GO:0005515:2	IPR001507:2;IPR001680:2;IPR024977:1	PF00400:2;PF00100:2;PF12894:1	SignalP-noTM:2
OG0002072	present	shared	40	20	10	5	1.66667	enriched	1.58496	0.00682312	1	2	HDUJA,RVARI	GO:0016757:33	IPR002495:33	PF01501:33	SignalP-noTM:4;SignalP-TM:1
OG0004985	present	shared	27	19	7	3.5	1.17647	enriched	1.57289	0.00168765	1	2	HDUJA,RVARI	GO:0016020:20;GO:0004970:20;GO:0005234:9	IPR001320:19;IPR001638:12;IPR019594:9;IPR001828:5	PF00060:19;PF00497:12;PF10613:9;PF01094:5	SignalP-noTM:7
OG0002142	present	shared	39	29	7	3.5	1.18519	enriched	1.56224	0.00134468	1	2	HDUJA,RVARI	GO:0005509:39;GO:0007076:1;GO:0000796:1	IPR002048:75;IPR022816:2	PF13499:74;PF05786:2;PF13202:1	N/A
OG0005885	present	shared	23	15	7	3.5	1.23077	enriched	1.50779	0.0074557	1	2	HDUJA,RVARI	N/A	IPR007858:18	PF05186:18;PF00406:4;PF13238:1	N/A
OG0006203	present	shared	21	16	6	3	1.07143	enriched	1.48543	0.00242375	1	2	HDUJA,RVARI	N/A	IPR009602:21	PF06730:21	N/A
OG0004133	present	shared	30	20	7	3.5	1.27778	enriched	1.45372	0.00615873	1	2	HDUJA,RVARI	GO:0004386:25;GO:0003676:24;GO:0005524:24	IPR001650:25;IPR007502:25;IPR011545:24;IPR002999:17;IPR032061:1	PF00271:25;PF04408:25;PF00270:24;PF00567:17;PF16060:1	N/A
OG0005682	present	shared	24	18	6	3	1.125	enriched	1.41504	0.00273821	1	2	HDUJA,RVARI	GO:0051424:23	IPR008435:25	PF05428:25	SignalP-noTM:12;SignalP-TM:1
OG0003463	present	shared	32	25	6	3	1.13043	enriched	1.40808	0.000726882	1	2	HDUJA,RVARI	GO:0005737:30;GO:0006516:30;GO:0045454:6;GO:0030246:2;GO:0005634:1;GO:0006355:1	IPR006588:30;IPR002931:19;IPR018997:12;IPR013766:6;IPR018325:6;IPR001079:4;IPR002867:1;IPR011494:1	PF04721:30;PF01841:19;PF09409:12;PF00085:6;PF03835:6;PF00337:4;PF07569:1;PF01485:1	SignalP-noTM:1
OG0004746	present	shared	28	21	6	3	1.15789	enriched	1.37346	0.00293319	1	2	HDUJA,RVARI	GO:0046983:25	IPR011598:25	PF00010:25	N/A
OG0002299	present	shared	38	29	6	3	1.18519	enriched	1.33985	0.00227663	1	2	HDUJA,RVARI	GO:0006355:38;GO:0005634:38;GO:0003700:1	IPR007282:35;IPR007207:33;IPR018108:3;IPR003894:1;IPR002893:1;IPR003021:1	PF04153:35;PF04065:33;PF00153:3;PF07531:1;PF01753:1;PF02144:1	N/A
OG0005805	present	shared	23	20	5	2.5	1	enriched	1.32193	0.00460653	1	2	HDUJA,RVARI	GO:0032981:20	IPR009622:20;IPR009071:1	PF06784:20;PF00505:1	SignalP-noTM:1
OG0006360	present	shared	20	17	5	2.5	1	enriched	1.32193	0.000113802	1	2	HDUJA,RVARI	N/A	IPR005178:20	PF03619:20	N/A
OG0007328	present	shared	15	12	5	2.5	1	enriched	1.32193	0.00170252	1	2	HDUJA,RVARI	N/A	IPR013259:6	PF08257:6	SignalP-noTM:9;SignalP-TM:1
OG0002660	present	shared	35	26	6	3	1.20833	enriched	1.31194	0.0035929	1	2	HDUJA,RVARI	GO:0003824:35;GO:0008152:35;GO:0004334:34;GO:0009072:34;GO:0008033:1;GO:0004540:1	IPR011234:37;IPR015377:34;IPR016009:1;IPR002885:1;IPR002738:1;IPR033443:1	PF01557:37;PF09298:34;PF01876:1;PF17177:1;PF01746:1;PF01535:1	SignalP-noTM:1
OG0002103	present	shared	39	29	6	3	1.22222	enriched	1.29546	0.00287017	1	2	HDUJA,RVARI	N/A	IPR020602:40	PF01227:40	N/A
OG0002145	present	shared	39	29	6	3	1.22222	enriched	1.29546	0.00424143	1	2	HDUJA,RVARI	GO:0005515:6	IPR013577:34;IPR013905:10;IPR001680:6	PF08366:34;PF08596:10;PF00400:6	N/A
OG0002287	present	shared	38	28	6	3	1.23077	enriched	1.2854	0.00801688	1	2	HDUJA,RVARI	GO:0016021:1	IPR007858:38;IPR008657:1	PF05186:38;PF05439:1	N/A
OG0002371	present	shared	37	27	6	3	1.24	enriched	1.27462	0.00460981	1	2	HDUJA,RVARI	N/A	IPR018108:108	PF00153:108	N/A
OG0005306	present	shared	26	18	6	3	1.25	enriched	1.26303	0.00892651	1	2	HDUJA,RVARI	GO:0016020:24;GO:0004930:1;GO:0007186:1;GO:0016021:1	IPR003864:25;IPR027815:25;IPR032880:24;IPR000276:1	PF02714:25;PF14703:25;PF13967:24;PF00001:1	SignalP-noTM:1
OG0004929	present	shared	28	24	5	2.5	1.04545	enriched	1.2578	0.000134439	1	2	HDUJA,RVARI	GO:0000213:25;GO:0006388:25	IPR006677:25;IPR006678:8	PF01974:25;PF02778:8	N/A
OG0001939	present	shared	41	29	6	3	1.2963	enriched	1.21057	0.00720642	1	2	HDUJA,RVARI	GO:0006468:38;GO:0005524:38;GO:0004672:38	IPR000719:38	PF00069:38	SignalP-noTM:1
OG0005585	present	shared	25	20	5	2.5	1.11111	enriched	1.16993	0.0028563	1	2	HDUJA,RVARI	N/A	IPR029204:25	PF15043:25	N/A
OG0003005	present	shared	34	28	5	2.5	1.11538	enriched	1.16439	0.00130287	1	2	HDUJA,RVARI	N/A	IPR002731:27;IPR019410:4	PF01869:27;PF10294:4	SignalP-noTM:1
OG0003312	present	shared	33	26	5	2.5	1.16667	enriched	1.09954	0.00326185	1	2	HDUJA,RVARI	GO:0003723:4;GO:0005515:3	IPR001313:5;IPR001810:3	PF00806:5;PF12937:3	N/A
OG0002366	present	shared	37	29	5	2.5	1.18519	enriched	1.07682	0.00556724	1	2	HDUJA,RVARI	GO:0006511:35;GO:0030833:1;GO:0015629:1;GO:0005634:1;GO:0005885:1;GO:0034314:1	IPR004854:35;IPR003021:2;IPR003788:1;IPR006789:1	PF03152:35;PF02144:2;PF04699:1;PF02636:1	SignalP-noTM:2
OG0002432	present	shared	37	29	5	2.5	1.18519	enriched	1.07682	0.00418516	1	2	HDUJA,RVARI	GO:0006468:35;GO:0005524:35;GO:0004672:35	IPR000719:35	PF00069:35	N/A
OG0002589	present	shared	36	28	5	2.5	1.19231	enriched	1.06817	0.00504468	1	2	HDUJA,RVARI	GO:0005515:31	IPR001452:31;IPR001060:30	PF00611:30;PF00018:22;PF14604:9	N/A
OG0002748	present	shared	35	27	5	2.5	1.2	enriched	1.05889	0.00406283	1	2	HDUJA,RVARI	GO:0006470:35;GO:0008138:35;GO:0002161:1	IPR000340:36;IPR007214:1	PF00782:36;PF04073:1	SignalP-noTM:2
OG0002800	present	shared	35	27	5	2.5	1.2	enriched	1.05889	0.00765766	1	2	HDUJA,RVARI	GO:0003824:35;GO:0000287:31;GO:0030145:31;GO:0004721:31	IPR001932:36;IPR012911:31;IPR002347:1	PF00481:36;PF07830:31;PF00106:1	SignalP-noTM:1
OG0002253	present	shared	38	29	5	2.5	1.22222	enriched	1.03242	0.00507502	1	2	HDUJA,RVARI	GO:0006750:38;GO:0004357:38;GO:0005921:1	IPR004308:41;IPR000990:1	PF03074:41;PF00876:1	N/A
OG0002265	present	shared	38	29	5	2.5	1.22222	enriched	1.03242	0.00942522	1	2	HDUJA,RVARI	GO:0006750:38;GO:0004363:38;GO:0005524:38;GO:0042981:1	IPR005615:44;IPR004887:38;IPR003734:2;IPR001315:1	PF03917:44;PF03199:38;PF02582:2;PF00656:1;PF00619:1	N/A
OG0002332	present	shared	37	28	5	2.5	1.23077	enriched	1.02237	0.00951266	1	2	HDUJA,RVARI	N/A	IPR032343:1;IPR025884:1	PF14580:31;PF16564:1;PF14048:1	N/A
OG0002539	present	shared	36	27	5	2.5	1.24	enriched	1.01159	0.00739448	1	2	HDUJA,RVARI	GO:0016779:30	IPR002934:30;IPR002058:29	PF01909:30;PF03828:29	N/A
OG0003920	present	shared	31	29	4	2	1	enriched	1	0.000402938	1	2	HDUJA,RVARI	GO:0003723:30;GO:0003676:30;GO:0003743:30;GO:0006368:1;GO:0008023:1	IPR003029:30;IPR011488:30;IPR019464:1;IPR010844:1	PF00575:30;PF07541:30;PF07303:1;PF10390:1	N/A
OG0003953	present	shared	31	29	4	2	1	enriched	1	0.000402938	1	2	HDUJA,RVARI	GO:0008290:31;GO:0051016:31	IPR001698:35	PF01115:35	N/A
OG0004984	present	shared	27	25	4	2	1	enriched	1	0.00117978	1	2	HDUJA,RVARI	N/A	IPR022712:25;IPR001279:21	PF10996:25;PF16661:21	N/A
OG0006525	present	shared	19	17	4	2	1	enriched	1	0.000110333	1	2	HDUJA,RVARI	N/A	IPR006802:15	PF04712:15	N/A
OG0006555	present	shared	19	17	4	2	1	enriched	1	0.000110333	1	2	HDUJA,RVARI	GO:0005737:19;GO:0016787:19;GO:0005634:19;GO:0006309:19;GO:0006915:17;GO:0005622:17	IPR015311:20;IPR003508:17	PF09230:20;PF02017:17	SignalP-noTM:1
OG0007867	present	shared	13	11	4	2	1	enriched	1	0.00282103	1	2	HDUJA,RVARI	GO:0005515:11;GO:0035556:5	IPR001680:34;IPR001496:5;IPR000022:1;IPR011659:1	PF00400:34;PF07525:5;PF01039:1;PF07676:1	N/A
OG0002148	present	shared	39	29	5	2.5	1.25926	enriched	0.989353	0.00507502	1	2	HDUJA,RVARI	GO:0005515:31	IPR002909:31;IPR000008:1	PF01833:31;PF15469:30;PF00168:1	N/A
OG0002157	present	shared	39	29	5	2.5	1.25926	enriched	0.989353	0.00958735	1	2	HDUJA,RVARI	GO:0003676:38	IPR000504:72	PF00076:72	N/A
OG0003351	present	shared	33	24	5	2.5	1.27273	enriched	0.974005	0.00377388	1	2	HDUJA,RVARI	GO:0016787:30	IPR000086:31	PF00293:31	SignalP-noTM:1
OG0001182	present	shared	56	29	7	3.5	1.81481	enriched	0.947533	0.00601292	1	2	HDUJA,RVARI	GO:0016020:1;GO:0005272:1;GO:0006814:1	IPR003511:49;IPR001873:2	PF02301:49;PF00858:2	N/A
OG0003645	present	shared	32	29	4	2	1.03704	enriched	0.947533	3.21e-05	1	2	HDUJA,RVARI	GO:0016820:31;GO:0015991:31;GO:0000221:31;GO:0006284:1;GO:0003824:1;GO:0003677:1;GO:0003905:1	IPR011987:31;IPR000891:1;IPR003180:1	PF03224:31;PF11698:31;PF02245:1;PF00682:1	N/A
OG0003778	present	shared	31	28	4	2	1.03846	enriched	0.945552	4.56e-05	1	2	HDUJA,RVARI	GO:0034220:31	IPR008218:31	PF01990:31	N/A
OG0003796	present	shared	31	28	4	2	1.03846	enriched	0.945552	4.56e-05	1	2	HDUJA,RVARI	GO:0006468:31;GO:0004672:31;GO:0005524:31;GO:0043161:1;GO:0006289:1;GO:0005515:1;GO:0003684:1	IPR000719:32;IPR015940:2;IPR000626:1;IPR015360:1	PF00069:32;PF00627:2;PF09280:1;PF00240:1	N/A
OG0004102	present	shared	30	27	4	2	1.04	enriched	0.943416	6.49e-05	1	2	HDUJA,RVARI	GO:0008270:30;GO:0005515:30	IPR001841:30;IPR003137:18;IPR000477:1	PF13639:30;PF02225:18;PF00078:1	SignalP-noTM:18;SignalP-TM:3
OG0004578	present	shared	29	26	4	2	1.04167	enriched	0.941106	9.24e-05	1	2	HDUJA,RVARI	GO:0008080:25	IPR000182:26;IPR018780:1	PF00583:26;PF10158:1	N/A
OG0004840	present	shared	28	25	4	2	1.04348	enriched	0.938599	0.000131749	1	2	HDUJA,RVARI	GO:0003993:28	IPR000560:28;IPR013651:1	PF00328:28;PF08443:1	SignalP-noTM:1
OG0005536	present	shared	25	22	4	2	1.05	enriched	0.929611	0.000383851	1	2	HDUJA,RVARI	GO:0000213:25;GO:0006388:25;GO:0005634:1;GO:0003677:1	IPR006677:25;IPR001739:1	PF01974:25;PF01429:1	N/A
OG0005620	present	shared	24	21	4	2	1.05263	enriched	0.925999	0.000549541	1	2	HDUJA,RVARI	GO:0007264:22;GO:0005085:22	IPR001895:22;IPR001849:11	PF00617:22;PF00169:11	N/A
OG0005623	present	shared	24	21	4	2	1.05263	enriched	0.925999	0.000549541	1	2	HDUJA,RVARI	GO:0035091:20;GO:0006468:13;GO:0004672:13;GO:0005524:9;GO:0003779:8	IPR001683:20;IPR000719:9;IPR003124:8;IPR001245:4	PF00787:20;PF00069:9;PF02205:8;PF07714:4	N/A
OG0003242	present	shared	33	29	4	2	1.07407	enriched	0.896907	0.000418075	1	2	HDUJA,RVARI	N/A	IPR032403:30	PF16528:30;PF08700:26	SignalP-noTM:1
OG0003376	present	shared	33	29	4	2	1.07407	enriched	0.896907	0.000418075	1	2	HDUJA,RVARI	GO:0006275:33;GO:0003677:33	IPR022649:34;IPR022648:33	PF02747:34;PF00705:33	N/A
OG0003435	present	shared	32	28	4	2	1.07692	enriched	0.893085	0.000547144	1	2	HDUJA,RVARI	GO:0005789:26;GO:0019915:26	IPR019388:28;IPR019331:1	PF10261:28;PF10187:1	N/A
OG0006768	present	shared	18	15	4	2	1.07692	enriched	0.893085	0.00490973	1	2	HDUJA,RVARI	GO:0007264:18;GO:0005525:18	IPR001806:18	PF00071:18	N/A
OG0003973	present	shared	31	27	4	2	1.08	enriched	0.888969	0.000716615	1	2	HDUJA,RVARI	GO:0003899:30;GO:0046983:30;GO:0006351:30	IPR011262:30;IPR009025:30	PF01000:30;PF01193:30	N/A
OG0004298	present	shared	30	26	4	2	1.08333	enriched	0.884523	0.000939367	1	2	HDUJA,RVARI	GO:0005634:30;GO:0006352:30;GO:0005515:1	IPR003923:30;IPR004045:1	PF03540:30;PF13417:1	N/A
OG0004335	present	shared	30	26	4	2	1.08333	enriched	0.884523	0.000939367	1	2	HDUJA,RVARI	N/A	IPR001005:11	PF00249:11	SignalP-noTM:1
OG0004490	present	shared	29	25	4	2	1.08696	enriched	0.879706	0.00123249	1	2	HDUJA,RVARI	GO:0005515:19	IPR000626:19	PF00240:19	N/A
OG0002095	present	shared	39	27	5	2.5	1.36	enriched	0.878321	0.00942774	1	2	HDUJA,RVARI	GO:0005089:32;GO:0035023:32;GO:0016831:1;GO:0030170:1;GO:0019752:1	IPR001357:32;IPR000219:32;IPR002129:1	PF00621:32;PF12738:26;PF00533:6;PF00282:1	SignalP-noTM:1
OG0005175	present	shared	27	23	4	2	1.09524	enriched	0.868755	0.00212829	1	2	HDUJA,RVARI	GO:0008270:3;GO:0003676:3;GO:0005515:1	IPR001878:3;IPR000210:1	PF00098:3;PF00651:1	SignalP-noTM:2
OG0002891	present	shared	34	29	4	2	1.11111	enriched	0.847997	0.00200488	1	2	HDUJA,RVARI	GO:0005634:2;GO:0006260:1;GO:0000808:1	IPR022775:34;IPR012617:1;IPR007220:1	PF01217:34;PF04084:1;PF08164:1	SignalP-noTM:2
OG0002928	present	shared	34	29	4	2	1.11111	enriched	0.847997	0.00200488	1	2	HDUJA,RVARI	GO:0008270:34	IPR000058:64;IPR003903:9;IPR001650:1;IPR025313:1	PF01428:64;PF02809:9;PF00271:1;PF13959:1	N/A
OG0003058	present	shared	34	29	4	2	1.11111	enriched	0.847997	0.00200488	1	2	HDUJA,RVARI	N/A	IPR019196:17;IPR003958:1	PF09822:17;PF00808:1	N/A
OG0003152	present	shared	33	28	4	2	1.11538	enriched	0.842459	0.00249675	1	2	HDUJA,RVARI	GO:0019722:33	IPR006931:33	PF04847:33	N/A
OG0003452	present	shared	32	27	4	2	1.12	enriched	0.836501	0.0031118	1	2	HDUJA,RVARI	N/A	N/A	N/A	N/A
OG0006232	present	shared	21	17	4	2	1.13333	enriched	0.819428	0.00502514	1	2	HDUJA,RVARI	GO:0016021:13	IPR004687:20	PF03821:20	SignalP-noTM:1
OG0003541	present	shared	32	21	5	2.5	1.42105	enriched	0.814968	0.00116839	1	2	HDUJA,RVARI	GO:0016787:1	IPR021752:8;IPR000246:1	PF11781:8;PF01112:1	N/A
OG0004812	present	shared	28	23	4	2	1.14286	enriched	0.807355	0.000561385	1	2	HDUJA,RVARI	N/A	IPR019347:30;IPR027377:1	PF10211:30;PF13695:1	N/A
OG0002650	present	shared	35	29	4	2	1.14815	enriched	0.800691	0.00580875	1	2	HDUJA,RVARI	N/A	IPR000073:28;IPR009755:1	PF00561:28;PF07035:1	N/A
OG0002735	present	shared	35	29	4	2	1.14815	enriched	0.800691	0.00580875	1	2	HDUJA,RVARI	GO:0005737:35;GO:0048278:35;GO:0006887:35;GO:0005634:1;GO:0008270:1	IPR009976:50;IPR013099:2;IPR019537:2;IPR025986:1;IPR012934:1	PF07393:50;PF07885:2;PF10507:2;PF07776:1;PF13877:1	N/A
OG0002785	present	shared	35	29	4	2	1.14815	enriched	0.800691	0.00580875	1	2	HDUJA,RVARI	N/A	IPR008555:35	PF05769:35	N/A
OG0002816	present	shared	35	29	4	2	1.14815	enriched	0.800691	0.00580875	1	2	HDUJA,RVARI	GO:0003676:35;GO:0005524:35;GO:0055114:1;GO:0016491:1	IPR011545:35;IPR001650:35;IPR013121:1	PF00270:35;PF00271:35;PF08030:1	N/A
OG0002871	present	shared	34	28	4	2	1.15385	enriched	0.793549	0.000959648	1	2	HDUJA,RVARI	GO:0005515:17	IPR025999:32;IPR000253:17	PF13325:32;PF00498:17	SignalP-noTM:1
OG0002897	present	shared	34	28	4	2	1.15385	enriched	0.793549	0.00699924	1	2	HDUJA,RVARI	GO:0009186:34;GO:0055114:34;GO:0005643:1;GO:0006810:1	IPR000358:34;IPR007252:2	PF00268:34;PF04121:2	N/A
OG0002968	present	shared	34	28	4	2	1.15385	enriched	0.793549	0.00699924	1	2	HDUJA,RVARI	GO:0008168:34;GO:0032259:34;GO:0051260:1	IPR002877:34;IPR003131:1	PF01728:34;PF02214:1	N/A
OG0003132	present	shared	33	27	4	2	1.16	enriched	0.785875	0.00844089	1	2	HDUJA,RVARI	N/A	IPR007919:34	PF05255:34	SignalP-TM:1
OG0003286	present	shared	33	27	4	2	1.16	enriched	0.785875	0.00496158	1	2	HDUJA,RVARI	GO:0005737:32;GO:0005515:32	IPR004148:32;IPR001452:13;IPR011511:5	PF03114:32;PF14604:12;PF07653:5;PF00018:1	N/A
OG0000813	present	shared	71	29	8	4	2.33333	enriched	0.777608	0.00963695	1	2	HDUJA,RVARI	GO:0003899:71;GO:0003677:71;GO:0006351:71;GO:0004725:1;GO:0006470:1	IPR007120:67;IPR007642:66;IPR007644:65;IPR007646:65;IPR007645:63;IPR007647:61;IPR007641:59;IPR016009:1;IPR019129:1;IPR000242:1	PF00562:67;PF04561:66;PF04563:65;PF04566:65;PF04565:63;PF04567:61;PF04560:59;PF09725:1;PF01746:1;PF00102:1	N/A
OG0002536	present	shared	36	29	4	2	1.18519	enriched	0.754888	0.00488583	1	2	HDUJA,RVARI	GO:0016491:36;GO:0055114:36;GO:0005509:27;GO:0006396:1;GO:0003723:1	IPR006076:36;IPR031656:35;IPR002048:29;IPR000061:1	PF01266:36;PF16901:35;PF13499:27;PF13833:2;PF01805:1	SignalP-noTM:6
OG0002543	present	shared	36	29	4	2	1.18519	enriched	0.754888	0.00864031	1	2	HDUJA,RVARI	GO:0008270:30;GO:0003676:1	IPR001594:30;IPR000504:1;IPR000980:1	PF01529:30;PF00076:1;PF00017:1	N/A
OG0002706	present	shared	35	28	4	2	1.19231	enriched	0.746243	0.00397151	1	2	HDUJA,RVARI	N/A	IPR010516:35;IPR012945:1	PF06487:35;PF07986:1	SignalP-noTM:1
OG0002430	present	shared	37	29	4	2	1.22222	enriched	0.710493	0.00864031	1	2	HDUJA,RVARI	GO:0006886:29;GO:0008536:29;GO:0005515:5;GO:0007264:1;GO:0005525:1	IPR001494:29;IPR000357:5;IPR001806:1	PF03810:29;PF13513:24;PF02985:5;PF00071:1	N/A
OG0002273	present	shared	38	29	4	2	1.25926	enriched	0.667425	0.00864031	1	2	HDUJA,RVARI	GO:0016742:1;GO:0009058:1	IPR022812:33;IPR005793:1;IPR002376:1	PF00350:33;PF02911:1;PF00551:1	N/A
OG0001102	present	shared	59	29	6	3	1.96296	enriched	0.61193	0.00484895	1	2	HDUJA,RVARI	GO:0006265:57;GO:0003916:57;GO:0003677:57;GO:0008270:16;GO:0005694:15;GO:0046983:1;GO:0016491:1;GO:0055114:1;GO:0005509:1	IPR013497:62;IPR006171:56;IPR010666:29;IPR013498:16;IPR002048:4;IPR014720:1;IPR023753:1;IPR029324:1	PF01131:62;PF01751:56;PF06839:29;PF01396:16;PF13202:4;PF00035:1;PF07992:1;PF13909:1;PF14721:1	SignalP-noTM:1
OG0004341	present	shared	30	29	3	1.5	1	enriched	0.584963	0.000402938	1	2	HDUJA,RVARI	GO:0001104:30;GO:0016592:30;GO:0006357:30	IPR007018:30	PF04934:30;PF05348:1	N/A
OG0004494	present	shared	29	28	3	1.5	1	enriched	0.584963	0.000526544	1	2	HDUJA,RVARI	GO:0003735:26;GO:0005840:26;GO:0006412:26;GO:0019843:26	IPR000529:26	PF01250:26	N/A
OG0004541	present	shared	29	28	3	1.5	1	enriched	0.584963	0.000526544	1	2	HDUJA,RVARI	GO:0003676:10;GO:0031110:1	IPR024326:27;IPR000504:10;IPR000956:1	PF12923:27;PF00076:10;PF00836:1	SignalP-noTM:1
OG0004730	present	shared	28	27	3	1.5	1	enriched	0.584963	0.000688514	1	2	HDUJA,RVARI	N/A	IPR028241:26	PF10259:26	SignalP-noTM:2
OG0004776	present	shared	28	27	3	1.5	1	enriched	0.584963	0.000688514	1	2	HDUJA,RVARI	GO:0008168:27;GO:0005840:1;GO:0005622:1;GO:0003735:1;GO:0005515:1;GO:0006412:1	IPR005304:27;IPR000915:1;IPR002083:1;IPR008145:1;IPR000210:1	PF03587:27;PF00917:1;PF00625:1;PF00651:1;PF01159:1	N/A
OG0004806	present	shared	28	27	3	1.5	1	enriched	0.584963	0.000688514	1	2	HDUJA,RVARI	GO:0016758:28;GO:0005789:28;GO:0006281:4;GO:0004519:4	IPR004856:28;IPR007581:4	PF03155:28;PF04493:4	SignalP-noTM:6
OG0004980	present	shared	27	26	3	1.5	1	enriched	0.584963	0.000900936	1	2	HDUJA,RVARI	N/A	IPR008506:1	PF05620:1	N/A
OG0005274	present	shared	26	25	3	1.5	1	enriched	0.584963	0.00117978	1	2	HDUJA,RVARI	GO:0001104:26;GO:0006355:26;GO:0016592:26;GO:0008033:1;GO:0008168:1	IPR008831:26;IPR021852:2;IPR021721:1;IPR007871:1;IPR022776:1	PF05669:26;PF11938:2;PF05253:1;PF11722:1;PF05206:1	N/A
OG0005347	present	shared	26	25	3	1.5	1	enriched	0.584963	0.00117978	1	2	HDUJA,RVARI	N/A	IPR010849:30	PF07324:30	N/A
OG0005717	present	shared	24	23	3	1.5	1	enriched	0.584963	0.00202823	1	2	HDUJA,RVARI	GO:0005515:15	IPR001611:36;IPR013098:6;IPR026906:2;IPR025875:2	PF13855:32;PF13927:6;PF07679:6;PF00560:3;PF12799:2;PF13306:2;PF13516:1	SignalP-noTM:15;SignalP-TM:1
OG0006183	present	shared	21	20	3	1.5	1	enriched	0.584963	0.00460653	1	2	HDUJA,RVARI	GO:0016020:21;GO:0006493:21;GO:0000030:21;GO:0006810:1	IPR003342:22;IPR032421:21;IPR016093:20;IPR002666:1	PF02366:22;PF16192:21;PF02815:20;PF01770:1	SignalP-noTM:1
OG0006185	present	shared	21	20	3	1.5	1	enriched	0.584963	0.00460653	1	2	HDUJA,RVARI	GO:0016757:20	IPR005599:21	PF03901:21	SignalP-noTM:7
OG0001086	present	shared	59	28	6	3	2.03846	enriched	0.557482	0.00819826	1	2	HDUJA,RVARI	GO:0005524:59	IPR003959:59;IPR015415:41	PF00004:59;PF09336:41	SignalP-noTM:1
OG0001840	present	shared	42	29	4	2	1.40741	enriched	0.50696	0.00864031	1	2	HDUJA,RVARI	GO:0016787:40;GO:0008152:40;GO:0016042:30;GO:0016298:30;GO:0008203:30;GO:0008270:1	IPR013094:66;IPR010468:32;IPR009724:1;IPR001781:1	PF07859:66;PF06350:32;PF00412:1;PF06979:1	N/A
OG0001138	present	shared	58	29	2	1	2.07407	depleted	-1.05247	0.00720642	1	2	HDUJA,RVARI	GO:0005509:54	IPR002048:145	PF13202:71;PF13499:45;PF13833:29	SignalP-noTM:40
OG0000950	present	shared	64	29	2	1	2.2963	depleted	-1.19931	0.00934864	1	2	HDUJA,RVARI	GO:0004114:57;GO:0007165:56;GO:0006260:1;GO:0005524:1;GO:0003677:1	IPR002073:56;IPR013706:25;IPR001208:1	PF00233:56;PF08499:25;PF00493:1	SignalP-noTM:1
OG0000604	present	shared	85	29	2	1	3.07407	depleted	-1.62015	0.00728966	1	2	HDUJA,RVARI	N/A	IPR001247:79;IPR015847:24;IPR004217:1	PF01138:79;PF03725:24;PF02953:1	SignalP-noTM:1
