# Supplementary material for: Comparative genomics of the tardigrades Hypsibius dujardini and Ramazzottius varieornatus
Source: PLoS Biol. 2017 Jul 27;15(7):e2002266. doi: 10.1371/journal.pbio.2002266 (PMC5531438; doi:10.1371/journal.pbio.2002266)
Supplement: S3 Data — (XLSX) [file pbio.2002266.s020.xlsx]

## Sheet: Sheet1
order	cluster_id	protein_count	HDUJA	RVARI	Functional annotation	Gene family name
0	IDs of clusters (restricted to Tardigrada)	Count of proteins within cluster	Count of H. dujardini proteins in cluster	Count of R. varieornatus proteins in cluster	Name of IPR domain(s) predicted in proteins in cluster (both tardigrades have at least one protein annotated with given domain description), percentage of proteins annotated under given domain in brackets	Manually assigned gene family name
1	OG0001332	52	48	4	IPR001828=Receptor ligand binding region (69.2%)
2	OG0001514	48	43	5	IPR000276=G protein-coupled receptor rhodopsin-like (70.8%)
3	OG0002446	37	33	4	None
4	OG0003114	34	26	8	IPR011735=HtrL protein (52.9%)
5	OG0005227	27	24	3	None
6	OG0006094	22	17	5	IPR001638=Solute-binding protein family 3/N-terminal domain of MltF (13.6%)
7	OG0006095	22	19	3	None
8	OG0006096	22	8	14	None
9	OG0006275	21	11	10	None	SAHS1
10	OG0006449	20	19	1	IPR001810=F-box domain (45.0%)
11	OG0006644	19	4	15	IPR013604=7TM chemoreceptor (26.3%)
12	OG0006645	19	18	1	IPR001828=Receptor ligand binding region (78.9%)
13	OG0006646	19	2	17	None
14	OG0006647	19	1	18	None
15	OG0006845	18	17	1	None
16	OG0006846	18	8	10	None
17	OG0006848	18	1	17	None
18	OG0007432	15	11	4	None
19	OG0007434	15	12	3	IPR014782=Peptidase M1 membrane alanine aminopeptidase N-terminal (80.0%);IPR024571=ERAP1-like C-terminal domain (73.3%)
20	OG0007633	14	4	10	None
21	OG0007871	13	9	4	None
22	OG0007873	13	10	3	None
23	OG0008150	12	10	2	IPR008166=Glycosyltransferase family 92 (66.7%)
24	OG0008151	12	11	1	IPR000276=G protein-coupled receptor rhodopsin-like (58.3%)
25	OG0008152	12	10	2	None
26	OG0008155	12	8	4	IPR000922=D-galactoside/L-rhamnose binding SUEL lectin domain (58.3%)
27	OG0008457	11	3	8	None
28	OG0008779	10	9	1	None
29	OG0008780	10	9	1	None
30	OG0008783	10	9	1	None
31	OG0009125	9	5	4	None
32	OG0009126	9	5	4	None
33	OG0009127	9	4	5	None
34	OG0009128	9	1	8	None
35	OG0009129	9	1	8	None
36	OG0009585	8	7	1	IPR000998=MAM domain (37.5%)
37	OG0009586	8	7	1	IPR000313=PWWP domain (37.5%)
38	OG0009587	8	7	1	None
39	OG0009588	8	7	1	None
40	OG0010134	7	4	3	IPR031569=Apextrin C-terminal domain (100.0%)
41	OG0010135	7	3	4	IPR024970=Maelstrom domain (85.7%)
42	OG0010136	7	6	1	None
43	OG0010137	7	6	1	IPR032104=Spaetzle (57.1%)
44	OG0010138	7	4	3	None
45	OG0010139	7	6	1	None
46	OG0010144	7	4	3	None
47	OG0010147	7	4	3	None
48	OG0010148	7	4	3	None
49	OG0010771	6	3	3	IPR011701=Major facilitator superfamily (100.0%)
50	OG0010772	6	4	2	None
51	OG0010773	6	5	1	None
52	OG0010774	6	4	2	None
53	OG0010775	6	4	2	IPR001828=Receptor ligand binding region (83.3%)
54	OG0010776	6	3	3	IPR008030=NmrA-like domain (66.7%)
55	OG0010777	6	4	2	None
56	OG0010782	6	5	1	None
57	OG0010783	6	4	2	IPR001506=Peptidase M12A (83.3%)
58	OG0010785	6	4	2	IPR000719=Protein kinase domain (100.0%)
59	OG0010787	6	1	5	None
60	OG0010788	6	3	3	None
61	OG0010789	6	5	1	None
62	OG0010790	6	1	5	None
63	OG0011576	5	2	3	None
64	OG0011577	5	1	4	None
65	OG0011579	5	3	2	IPR011701=Major facilitator superfamily (100.0%)
66	OG0011581	5	3	2	IPR001304=C-type lectin-like (80.0%)
67	OG0011583	5	2	3	None
68	OG0011584	5	4	1	None
69	OG0011585	5	1	4	None
70	OG0011586	5	3	2	IPR011705=BTB/Kelch-associated (100.0%);IPR000210=BTB/POZ domain (100.0%)
71	OG0011587	5	1	4	None
72	OG0011589	5	2	3	None
73	OG0011592	5	4	1	None
74	OG0011594	5	4	1	None
75	OG0011595	5	1	4	None	CAHS3
76	OG0011596	5	3	2	None
77	OG0011597	5	2	3	None
78	OG0011599	5	4	1	None
79	OG0011600	5	2	3	None
80	OG0011601	5	1	4	None
81	OG0011604	5	3	2	None
82	OG0011605	5	2	3	None
83	OG0011607	5	3	2	IPR001223=Glycoside hydrolase family 18 catalytic domain (100.0%)
84	OG0011614	5	1	4	IPR032633=ThiJ/PfpI family-like (80.0%)
85	OG0011616	5	4	1	IPR008753=Peptidase M13 N-terminal domain (100.0%);IPR018497=Peptidase M13 C-terminal domain (100.0%)
86	OG0011618	5	4	1	IPR001054=Adenylyl cyclase class-3/4/guanylyl cyclase (100.0%);IPR001245=Serine-threonine/tyrosine-protein kinase catalytic domain (80.0%);IPR001828=Receptor ligand binding region (40.0%)
87	OG0011620	5	4	1	None
88	OG0011623	5	2	3	None
89	OG0011624	5	2	3	None
90	OG0011626	5	4	1	IPR001506=Peptidase M12A (100.0%)
91	OG0011629	5	3	2	None
92	OG0012582	4	3	1	IPR009784=Protein of unknown function DUF1349 (100.0%)
93	OG0012583	4	3	1	None
94	OG0012586	4	3	1	IPR001254=Serine proteases trypsin domain (100.0%)
95	OG0012587	4	2	2	None
96	OG0012588	4	3	1	None
97	OG0012589	4	3	1	None
98	OG0012592	4	3	1	IPR013604=7TM chemoreceptor (75.0%)
99	OG0012594	4	3	1	None
100	OG0012595	4	2	2	IPR011705=BTB/Kelch-associated (75.0%);IPR000210=BTB/POZ domain (50.0%)
101	OG0012596	4	2	2	IPR011705=BTB/Kelch-associated (100.0%);IPR000210=BTB/POZ domain (100.0%)
102	OG0012597	4	3	1	IPR018862=Eukaryotic translation initiation factor 4E binding protein (75.0%)
103	OG0012598	4	2	2	IPR001245=Serine-threonine/tyrosine-protein kinase catalytic domain (100.0%);IPR001054=Adenylyl cyclase class-3/4/guanylyl cyclase (75.0%)
104	OG0012599	4	2	2	IPR006678=tRNA intron endonuclease N-terminal (75.0%)
105	OG0012602	4	2	2	None
106	OG0012603	4	3	1	None
107	OG0012604	4	3	1	None
108	OG0012606	4	3	1	None
109	OG0012610	4	3	1	None
110	OG0012611	4	2	2	None
111	OG0012612	4	2	2	None
112	OG0012613	4	3	1	None
113	OG0012614	4	2	2	IPR000210=BTB/POZ domain (75.0%)
114	OG0012615	4	3	1	None
115	OG0012616	4	3	1	None
116	OG0012617	4	3	1	None
117	OG0012618	4	2	2	None
118	OG0012619	4	3	1	IPR023796=Serpin domain (100.0%)
119	OG0012622	4	2	2	IPR001245=Serine-threonine/tyrosine-protein kinase catalytic domain (100.0%);IPR001054=Adenylyl cyclase class-3/4/guanylyl cyclase (75.0%);IPR024370=PBP domain (50.0%)
120	OG0012623	4	2	2	None
121	OG0012624	4	2	2	None
122	OG0012626	4	2	2	IPR028941=WHIM2 domain (100.0%)
123	OG0012627	4	3	1	None
124	OG0012631	4	3	1	None
125	OG0012632	4	1	3	None
126	OG0012633	4	2	2	IPR019135=Polycomb protein VEFS-Box (100.0%)
127	OG0012635	4	3	1	None
128	OG0012636	4	3	1	IPR001506=Peptidase M12A (75.0%)
129	OG0012639	4	3	1	None
130	OG0012640	4	3	1	None
131	OG0012641	4	1	3	None
132	OG0012644	4	3	1	IPR001506=Peptidase M12A (75.0%)
133	OG0012645	4	3	1	None
134	OG0012646	4	3	1	IPR000276=G protein-coupled receptor rhodopsin-like (75.0%)
135	OG0012647	4	3	1	None
136	OG0012648	4	3	1	IPR000504=RNA recognition motif domain (75.0%)
137	OG0012649	4	3	1	None
138	OG0012652	4	3	1	IPR000504=RNA recognition motif domain (50.0%)
139	OG0012653	4	2	2	None
140	OG0012655	4	3	1	None
141	OG0012657	4	2	2	None
142	OG0012658	4	3	1	None
143	OG0012659	4	3	1	None
144	OG0012661	4	3	1	None
145	OG0012663	4	2	2	None
146	OG0012664	4	3	1	None
147	OG0012670	4	2	2	None
148	OG0014097	3	2	1	None
149	OG0014098	3	2	1	None
150	OG0014099	3	2	1	IPR018108=Mitochondrial substrate/solute carrier (100.0%)
151	OG0014100	3	1	2	None
152	OG0014101	3	1	2	IPR005828=Major facilitator sugar transporter-like (100.0%)
153	OG0014103	3	2	1	None
154	OG0014104	3	2	1	IPR007110=Immunoglobulin-like domain (66.7%);IPR013162=CD80-like immunoglobulin C2-set (66.7%)
155	OG0014105	3	2	1	IPR005821=Ion transport domain (100.0%);IPR003131=Potassium channel tetramerisation-type BTB domain (100.0%)
156	OG0014106	3	2	1	None
157	OG0014107	3	1	2	None
158	OG0014108	3	1	2	None
159	OG0014109	3	2	1	None
160	OG0014110	3	2	1	None
161	OG0014111	3	2	1	None
162	OG0014112	3	2	1	None
163	OG0014113	3	1	2	None
164	OG0014114	3	2	1	None
165	OG0014115	3	2	1	IPR000956=Stathmin family (100.0%)
166	OG0014116	3	2	1	None
167	OG0014118	3	2	1	IPR000668=Peptidase C1A papain C-terminal (100.0%)
168	OG0014119	3	2	1	IPR000276=G protein-coupled receptor rhodopsin-like (100.0%)
169	OG0014121	3	2	1	None
170	OG0014124	3	2	1	None
171	OG0014126	3	2	1	None
172	OG0014127	3	2	1	IPR001638=Solute-binding protein family 3/N-terminal domain of MltF (66.7%)
173	OG0014129	3	1	2	IPR000608=Ubiquitin-conjugating enzyme E2 (100.0%)
174	OG0014130	3	1	2	None
175	OG0014131	3	1	2	IPR000504=RNA recognition motif domain (66.7%)
176	OG0014132	3	2	1	IPR011547=SLC26A/SulP transporter domain (100.0%);IPR002645=STAS domain (100.0%)
177	OG0014133	3	2	1	None
178	OG0014134	3	2	1	IPR000716=Thyroglobulin type-1 (66.7%)
179	OG0014135	3	2	1	IPR000560=Histidine phosphatase superfamily clade-2 (100.0%)
180	OG0014136	3	2	1	None
181	OG0014137	3	2	1	None
182	OG0014140	3	2	1	None
183	OG0014141	3	2	1	None
184	OG0014142	3	2	1	None
185	OG0014146	3	2	1	None
186	OG0014148	3	1	2	None
187	OG0014149	3	2	1	None	CAHS1
188	OG0014151	3	1	2	None
189	OG0014152	3	2	1	None
190	OG0014153	3	1	2	None
191	OG0014154	3	2	1	None
192	OG0014155	3	2	1	None
193	OG0014157	3	2	1	None
194	OG0014158	3	2	1	None
195	OG0014159	3	2	1	None
196	OG0014160	3	2	1	None
197	OG0014161	3	2	1	None
198	OG0014162	3	2	1	None
199	OG0014164	3	1	2	None
200	OG0014165	3	2	1	None
201	OG0014167	3	2	1	IPR001245=Serine-threonine/tyrosine-protein kinase catalytic domain (100.0%)
202	OG0014168	3	2	1	None
203	OG0014169	3	2	1	None
204	OG0014170	3	2	1	IPR024741=Condensin-2 complex subunit G2 (66.7%)
205	OG0014171	3	2	1	None
206	OG0014172	3	2	1	None
207	OG0014173	3	2	1	None
208	OG0014175	3	2	1	None
209	OG0014176	3	2	1	None
210	OG0014179	3	1	2	None
211	OG0014180	3	2	1	None
212	OG0014181	3	2	1	None
213	OG0014182	3	1	2	None
214	OG0014183	3	1	2	None
215	OG0014185	3	1	2	None
216	OG0014186	3	2	1	None
217	OG0014188	3	2	1	None
218	OG0014189	3	2	1	None
219	OG0014190	3	2	1	None
220	OG0014191	3	2	1	IPR000276=G protein-coupled receptor rhodopsin-like (100.0%)
221	OG0014192	3	2	1	IPR012312=Haemerythrin-like (66.7%)
222	OG0014193	3	1	2	IPR006612=Zinc finger C2CH-type (100.0%)
223	OG0014195	3	1	2	IPR001054=Adenylyl cyclase class-3/4/guanylyl cyclase (100.0%);IPR001245=Serine-threonine/tyrosine-protein kinase catalytic domain (100.0%);IPR001828=Receptor ligand binding region (100.0%)
224	OG0014197	3	2	1	None
225	OG0014198	3	2	1	None
226	OG0014199	3	2	1	None
227	OG0014200	3	2	1	None
228	OG0014201	3	2	1	None
229	OG0014202	3	2	1	IPR023796=Serpin domain (100.0%)
230	OG0014203	3	2	1	None
231	OG0014204	3	2	1	None
232	OG0014205	3	1	2	None
233	OG0014206	3	1	2	None
234	OG0014207	3	1	2	IPR001628=Zinc finger nuclear hormone receptor-type (100.0%);IPR000536=Nuclear hormone receptor ligand-binding domain (100.0%)
235	OG0014208	3	2	1	None
236	OG0014209	3	2	1	None
237	OG0014211	3	2	1	IPR029444=Integrator complex subunit 5 C-terminal (66.7%)
238	OG0014212	3	2	1	IPR001320=Ionotropic glutamate receptor (100.0%)
239	OG0014217	3	1	2	None
240	OG0014218	3	2	1	IPR001254=Serine proteases trypsin domain (100.0%)
241	OG0014219	3	2	1	IPR003888=FY-rich N-terminal (66.7%)
242	OG0014220	3	2	1	None
243	OG0014221	3	2	1	None
244	OG0014224	3	2	1	None
245	OG0014226	3	2	1	None
246	OG0014229	3	2	1	IPR010441=CH-like domain in sperm protein (66.7%)
247	OG0014232	3	2	1	IPR002759=Ribonuclease P/MRP protein subunit (66.7%)
248	OG0014234	3	2	1	None
249	OG0014235	3	1	2	None
250	OG0014238	3	1	2	IPR011547=SLC26A/SulP transporter domain (100.0%);IPR002645=STAS domain (100.0%)
251	OG0014239	3	2	1	IPR000276=G protein-coupled receptor rhodopsin-like (100.0%)
252	OG0014240	3	2	1	None
253	OG0014241	3	2	1	None
254	OG0014242	3	2	1	None
255	OG0014244	3	1	2	None
256	OG0014245	3	1	2	None
257	OG0014246	3	2	1	None
258	OG0014248	3	2	1	None
259	OG0014249	3	2	1	IPR018499=Tetraspanin/Peripherin (100.0%)
260	OG0014250	3	2	1	None
261	OG0014253	3	2	1	IPR001623=DnaJ domain (66.7%)
262	OG0014254	3	2	1	None
263	OG0014255	3	1	2	None
264	OG0014256	3	2	1	None
265	OG0014257	3	1	2	None
266	OG0014260	3	2	1	None
267	OG0014261	3	2	1	IPR004875=DDE superfamily endonuclease domain (100.0%)
268	OG0014262	3	1	2	None
269	OG0014263	3	2	1	None
270	OG0014266	3	1	2	None
271	OG0014267	3	2	1	None
272	OG0014268	3	1	2	None
273	OG0014269	3	2	1	None
274	OG0014273	3	2	1	None
275	OG0016745	2	1	1	None
276	OG0016746	2	1	1	None
277	OG0016747	2	1	1	IPR001254=Serine proteases trypsin domain (100.0%)
278	OG0016748	2	1	1	None
279	OG0016749	2	1	1	None
280	OG0016750	2	1	1	IPR000276=G protein-coupled receptor rhodopsin-like (100.0%)
281	OG0016751	2	1	1	IPR001254=Serine proteases trypsin domain (100.0%)
282	OG0016752	2	1	1	IPR001254=Serine proteases trypsin domain (100.0%)
283	OG0016753	2	1	1	None
284	OG0016754	2	1	1	None
285	OG0016755	2	1	1	None
286	OG0016756	2	1	1	None
287	OG0016757	2	1	1	None
288	OG0016758	2	1	1	IPR001506=Peptidase M12A (100.0%)
289	OG0016759	2	1	1	None
290	OG0016760	2	1	1	None
291	OG0016761	2	1	1	None
292	OG0016762	2	1	1	None
293	OG0016763	2	1	1	IPR001506=Peptidase M12A (100.0%)
294	OG0016764	2	1	1	IPR001506=Peptidase M12A (100.0%)
295	OG0016765	2	1	1	IPR006652=Kelch repeat type 1 (100.0%);IPR000210=BTB/POZ domain (100.0%)
296	OG0016766	2	1	1	None
297	OG0016767	2	1	1	None
298	OG0016768	2	1	1	None
299	OG0016769	2	1	1	None
300	OG0016770	2	1	1	None
301	OG0016771	2	1	1	IPR000998=MAM domain (100.0%);IPR001254=Serine proteases trypsin domain (100.0%)
302	OG0016772	2	1	1	None
303	OG0016773	2	1	1	IPR002126=Cadherin (100.0%)
304	OG0016775	2	1	1	None
305	OG0016776	2	1	1	None
306	OG0016777	2	1	1	None
307	OG0016778	2	1	1	IPR002659=Glycosyl transferase family 31 (100.0%)
308	OG0016779	2	1	1	None
309	OG0016780	2	1	1	None
310	OG0016781	2	1	1	None
311	OG0016782	2	1	1	None
312	OG0016783	2	1	1	None
313	OG0016784	2	1	1	None
314	OG0016785	2	1	1	IPR001506=Peptidase M12A (100.0%)
315	OG0016786	2	1	1	IPR000210=BTB/POZ domain (100.0%)
316	OG0016787	2	1	1	None
317	OG0016788	2	1	1	None
318	OG0016789	2	1	1	None
319	OG0016790	2	1	1	IPR001506=Peptidase M12A (100.0%)
320	OG0016791	2	1	1	None
321	OG0016792	2	1	1	None
322	OG0016793	2	1	1	None
323	OG0016794	2	1	1	None
324	OG0016795	2	1	1	None
325	OG0016796	2	1	1	None
326	OG0016797	2	1	1	None
327	OG0016798	2	1	1	IPR000719=Protein kinase domain (100.0%)
328	OG0016799	2	1	1	None
329	OG0016800	2	1	1	None
330	OG0016801	2	1	1	None
331	OG0016802	2	1	1	None
332	OG0016803	2	1	1	None
333	OG0016804	2	1	1	None
334	OG0016805	2	1	1	IPR001254=Serine proteases trypsin domain (100.0%)
335	OG0016806	2	1	1	IPR003961=Fibronectin type III (100.0%)
336	OG0016807	2	1	1	None
337	OG0016808	2	1	1	None
338	OG0016809	2	1	1	None
339	OG0016810	2	1	1	None
340	OG0016811	2	1	1	IPR006588=Peptide N glycanase PAW domain (100.0%)
341	OG0016812	2	1	1	None
342	OG0016813	2	1	1	None
343	OG0016814	2	1	1	IPR002049=Laminin EGF domain (100.0%);IPR008211=Laminin N-terminal (100.0%)
344	OG0016815	2	1	1	None
345	OG0016816	2	1	1	None
346	OG0016817	2	1	1	IPR011016=Zinc finger RING-CH-type (100.0%)
347	OG0016818	2	1	1	None
348	OG0016819	2	1	1	None
349	OG0016820	2	1	1	None
350	OG0016821	2	1	1	None
351	OG0016822	2	1	1	None
352	OG0016823	2	1	1	IPR001054=Adenylyl cyclase class-3/4/guanylyl cyclase (100.0%);IPR001245=Serine-threonine/tyrosine-protein kinase catalytic domain (100.0%);IPR001828=Receptor ligand binding region (100.0%)
353	OG0016824	2	1	1	None
354	OG0016825	2	1	1	IPR003150=DNA-binding RFX-type winged-helix domain (100.0%)
355	OG0016826	2	1	1	None
356	OG0016827	2	1	1	None
357	OG0016828	2	1	1	None
358	OG0016829	2	1	1	None
359	OG0016830	2	1	1	None
360	OG0016831	2	1	1	None
361	OG0016832	2	1	1	None
362	OG0016833	2	1	1	IPR002557=Chitin binding domain (100.0%);IPR001223=Glycoside hydrolase family 18 catalytic domain (100.0%)
363	OG0016834	2	1	1	IPR018392=LysM domain (100.0%);IPR001223=Glycoside hydrolase family 18 catalytic domain (100.0%)
364	OG0016835	2	1	1	None
365	OG0016836	2	1	1	None
366	OG0016837	2	1	1	None
367	OG0016838	2	1	1	None
368	OG0016839	2	1	1	None
369	OG0016840	2	1	1	None
370	OG0016841	2	1	1	None
371	OG0016842	2	1	1	None
372	OG0016843	2	1	1	None
373	OG0016844	2	1	1	None
374	OG0016845	2	1	1	None
375	OG0016846	2	1	1	IPR001594=Zinc finger DHHC-type palmitoyltransferase (100.0%)
376	OG0016847	2	1	1	None
377	OG0016848	2	1	1	None
378	OG0016849	2	1	1	None
379	OG0016850	2	1	1	None
380	OG0016851	2	1	1	None
381	OG0016852	2	1	1	None
382	OG0016853	2	1	1	None
383	OG0016854	2	1	1	None
384	OG0016855	2	1	1	None
385	OG0016856	2	1	1	None
386	OG0016857	2	1	1	IPR018502=Annexin repeat (100.0%)
387	OG0016858	2	1	1	None
388	OG0016860	2	1	1	None
389	OG0016861	2	1	1	None
390	OG0016862	2	1	1	None
391	OG0016863	2	1	1	None	CAHS2
392	OG0016864	2	1	1	None
393	OG0016865	2	1	1	None
394	OG0016866	2	1	1	None
395	OG0016867	2	1	1	None
396	OG0016868	2	1	1	IPR000884=Thrombospondin type-1 (TSP1) repeat (100.0%)
397	OG0016869	2	1	1	IPR018574=Structure-specific endonuclease subunit Slx4 (100.0%)
398	OG0016870	2	1	1	None
399	OG0016871	2	1	1	None
400	OG0016872	2	1	1	None
401	OG0016873	2	1	1	None
402	OG0016874	2	1	1	None
403	OG0016875	2	1	1	None
404	OG0016876	2	1	1	IPR000859=CUB domain (100.0%);IPR001254=Serine proteases trypsin domain (100.0%)
405	OG0016877	2	1	1	None
406	OG0016878	2	1	1	None
407	OG0016879	2	1	1	None
408	OG0016880	2	1	1	None
409	OG0016881	2	1	1	None
410	OG0016882	2	1	1	None
411	OG0016883	2	1	1	IPR001254=Serine proteases trypsin domain (100.0%)
412	OG0016884	2	1	1	None
413	OG0016885	2	1	1	None
414	OG0016886	2	1	1	None
415	OG0016887	2	1	1	None
416	OG0016888	2	1	1	None
417	OG0016889	2	1	1	None
418	OG0016890	2	1	1	IPR001478=PDZ domain (100.0%)
419	OG0016891	2	1	1	None
420	OG0016892	2	1	1	None
421	OG0016893	2	1	1	None
422	OG0016894	2	1	1	None
423	OG0016895	2	1	1	IPR000504=RNA recognition motif domain (100.0%)
424	OG0016896	2	1	1	None
425	OG0016897	2	1	1	None
426	OG0016898	2	1	1	None
427	OG0016899	2	1	1	None
428	OG0016900	2	1	1	None
429	OG0016901	2	1	1	IPR001680=WD40 repeat (100.0%)
430	OG0016902	2	1	1	None
431	OG0016903	2	1	1	None
432	OG0016904	2	1	1	None
433	OG0016905	2	1	1	None
434	OG0016906	2	1	1	None
435	OG0016907	2	1	1	None
436	OG0016908	2	1	1	None
437	OG0016909	2	1	1	None
438	OG0016910	2	1	1	IPR002999=Tudor domain (100.0%)
439	OG0016911	2	1	1	IPR000276=G protein-coupled receptor rhodopsin-like (100.0%)
440	OG0016912	2	1	1	None
441	OG0016913	2	1	1	None
442	OG0016914	2	1	1	IPR006588=Peptide N glycanase PAW domain (100.0%)
443	OG0016915	2	1	1	IPR004352=Glycoside-hydrolase family GH114 TIM-barrel domain (100.0%)
444	OG0016916	2	1	1	None
445	OG0016917	2	1	1	None
446	OG0016918	2	1	1	None
447	OG0016919	2	1	1	IPR002557=Chitin binding domain (100.0%)
448	OG0016920	2	1	1	None
449	OG0016921	2	1	1	None
450	OG0016922	2	1	1	None
451	OG0016923	2	1	1	None
452	OG0016924	2	1	1	None
453	OG0016925	2	1	1	None
454	OG0016927	2	1	1	None
455	OG0016928	2	1	1	IPR003610=Carbohydrate-binding module family 5/12 (100.0%)
456	OG0016929	2	1	1	None
457	OG0016930	2	1	1	None
458	OG0016931	2	1	1	None
459	OG0016932	2	1	1	None
460	OG0016933	2	1	1	None
461	OG0016934	2	1	1	None
462	OG0016935	2	1	1	None
463	OG0016936	2	1	1	None
464	OG0016937	2	1	1	None
465	OG0016938	2	1	1	None
466	OG0016939	2	1	1	None
467	OG0016940	2	1	1	None
468	OG0016941	2	1	1	None
469	OG0016942	2	1	1	None
470	OG0016943	2	1	1	None
471	OG0016944	2	1	1	None
472	OG0016945	2	1	1	None
473	OG0016946	2	1	1	None
474	OG0016947	2	1	1	None
475	OG0016948	2	1	1	IPR003609=PAN/Apple domain (100.0%)
476	OG0016949	2	1	1	None
477	OG0016950	2	1	1	None
478	OG0016951	2	1	1	None
479	OG0016952	2	1	1	IPR006689=Small GTPase superfamily ARF/SAR type (100.0%)
480	OG0016953	2	1	1	None
481	OG0016954	2	1	1	IPR011547=SLC26A/SulP transporter domain (100.0%);IPR002645=STAS domain (100.0%)
482	OG0016955	2	1	1	None
483	OG0016956	2	1	1	IPR001054=Adenylyl cyclase class-3/4/guanylyl cyclase (100.0%);IPR001828=Receptor ligand binding region (100.0%)
484	OG0016957	2	1	1	None
485	OG0016959	2	1	1	None
486	OG0016960	2	1	1	None
487	OG0016961	2	1	1	None
488	OG0016962	2	1	1	None
489	OG0016963	2	1	1	None
490	OG0016964	2	1	1	None
491	OG0016965	2	1	1	None
492	OG0016966	2	1	1	None
493	OG0016967	2	1	1	IPR018957=Zinc finger C3HC4 RING-type (100.0%)
494	OG0016968	2	1	1	IPR013766=Thioredoxin domain (100.0%)
495	OG0016969	2	1	1	None
496	OG0016970	2	1	1	IPR013766=Thioredoxin domain (100.0%)
497	OG0016971	2	1	1	None
498	OG0016972	2	1	1	IPR001506=Peptidase M12A (100.0%)
499	OG0016973	2	1	1	IPR011701=Major facilitator superfamily (100.0%)
500	OG0016975	2	1	1	IPR000719=Protein kinase domain (100.0%)
501	OG0016976	2	1	1	IPR006202=Neurotransmitter-gated ion-channel ligand-binding domain (100.0%)
502	OG0016977	2	1	1	IPR019545=DM13 domain (100.0%)
503	OG0016978	2	1	1	IPR002073=3'5'-cyclic nucleotide phosphodiesterase catalytic domain (100.0%)
504	OG0016979	2	1	1	None
505	OG0016980	2	1	1	None
506	OG0016981	2	1	1	None
507	OG0016982	2	1	1	None
508	OG0016983	2	1	1	IPR022675=Glucose-6-phosphate dehydrogenase C-terminal (100.0%);IPR022674=Glucose-6-phosphate dehydrogenase NAD-binding (100.0%)
509	OG0016984	2	1	1	IPR019034=Uncharacterised protein family UPF0390 (100.0%)
510	OG0016985	2	1	1	None
511	OG0016986	2	1	1	IPR000814=TATA-box binding protein (100.0%)
512	OG0016987	2	1	1	None
513	OG0016988	2	1	1	None
514	OG0016989	2	1	1	None
515	OG0016990	2	1	1	None
516	OG0016991	2	1	1	None
517	OG0016992	2	1	1	None
518	OG0016993	2	1	1	None
519	OG0016994	2	1	1	None
520	OG0016995	2	1	1	None
521	OG0016996	2	1	1	None
522	OG0016997	2	1	1	IPR001245=Serine-threonine/tyrosine-protein kinase catalytic domain (100.0%);IPR001054=Adenylyl cyclase class-3/4/guanylyl cyclase (100.0%)
523	OG0016998	2	1	1	None
524	OG0016999	2	1	1	None
525	OG0017000	2	1	1	None
526	OG0017001	2	1	1	None
527	OG0017002	2	1	1	None
528	OG0017003	2	1	1	None
529	OG0017004	2	1	1	None
530	OG0017005	2	1	1	None
531	OG0017006	2	1	1	IPR001254=Serine proteases trypsin domain (100.0%)
532	OG0017007	2	1	1	None
533	OG0017008	2	1	1	None
534	OG0017009	2	1	1	IPR001806=Small GTPase superfamily (100.0%)
535	OG0017010	2	1	1	None
536	OG0017012	2	1	1	None
537	OG0017013	2	1	1	None
538	OG0017014	2	1	1	None
539	OG0017015	2	1	1	IPR001223=Glycoside hydrolase family 18 catalytic domain (100.0%)
540	OG0017016	2	1	1	None
541	OG0017017	2	1	1	IPR019143=JNK/Rab-associated protein-1 N-terminal (100.0%)
542	OG0017018	2	1	1	None
543	OG0017019	2	1	1	None
544	OG0017020	2	1	1	IPR001254=Serine proteases trypsin domain (100.0%);IPR000859=CUB domain (100.0%)
545	OG0017021	2	1	1	None
546	OG0017022	2	1	1	None
547	OG0017023	2	1	1	None
548	OG0017024	2	1	1	IPR000276=G protein-coupled receptor rhodopsin-like (100.0%)
549	OG0017025	2	1	1	IPR008753=Peptidase M13 N-terminal domain (100.0%);IPR018497=Peptidase M13 C-terminal domain (100.0%)
550	OG0017026	2	1	1	None
551	OG0017027	2	1	1	None
552	OG0017028	2	1	1	None
553	OG0017029	2	1	1	None
554	OG0017030	2	1	1	None
555	OG0017031	2	1	1	None
556	OG0017032	2	1	1	None
557	OG0017033	2	1	1	None
558	OG0017034	2	1	1	None
559	OG0017035	2	1	1	None
560	OG0017036	2	1	1	None
561	OG0017037	2	1	1	None
562	OG0017038	2	1	1	None
563	OG0017039	2	1	1	None
564	OG0017040	2	1	1	None
565	OG0017041	2	1	1	None
566	OG0017042	2	1	1	None
567	OG0017043	2	1	1	None
568	OG0017044	2	1	1	None
569	OG0017045	2	1	1	None
570	OG0017046	2	1	1	None
571	OG0017048	2	1	1	None
572	OG0017049	2	1	1	IPR000719=Protein kinase domain (100.0%)
573	OG0017050	2	1	1	None
574	OG0017051	2	1	1	None
575	OG0017052	2	1	1	None
576	OG0017053	2	1	1	IPR000719=Protein kinase domain (100.0%)
577	OG0017054	2	1	1	IPR001040=Translation Initiation factor eIF- 4e (100.0%)
578	OG0017055	2	1	1	IPR000719=Protein kinase domain (100.0%)
579	OG0017056	2	1	1	None
580	OG0017057	2	1	1	None
581	OG0017058	2	1	1	None
582	OG0017059	2	1	1	None
583	OG0017060	2	1	1	IPR000719=Protein kinase domain (100.0%)
584	OG0017061	2	1	1	IPR028043=Protein of unknown function DUF4506 (100.0%)
585	OG0017062	2	1	1	IPR000198=Rho GTPase-activating protein domain (100.0%)
586	OG0017063	2	1	1	None
587	OG0017064	2	1	1	None
588	OG0017065	2	1	1	None
589	OG0017066	2	1	1	None
590	OG0017067	2	1	1	None
591	OG0017068	2	1	1	None
592	OG0017069	2	1	1	None
593	OG0017070	2	1	1	None
594	OG0017071	2	1	1	None
595	OG0017072	2	1	1	None
596	OG0017073	2	1	1	None
597	OG0017074	2	1	1	None
598	OG0017075	2	1	1	None
599	OG0017076	2	1	1	IPR032104=Spaetzle (100.0%)
600	OG0017077	2	1	1	None
601	OG0017078	2	1	1	IPR003511=HORMA domain (100.0%)
602	OG0017079	2	1	1	None
603	OG0017080	2	1	1	None
604	OG0017081	2	1	1	None
605	OG0017082	2	1	1	None
606	OG0017083	2	1	1	IPR004148=BAR domain (100.0%)
607	OG0017084	2	1	1	None
608	OG0017085	2	1	1	None
609	OG0017086	2	1	1	None
610	OG0017087	2	1	1	None
611	OG0017088	2	1	1	None
612	OG0017089	2	1	1	IPR000008=C2 domain (100.0%)
613	OG0017091	2	1	1	None
614	OG0017092	2	1	1	IPR001254=Serine proteases trypsin domain (100.0%)
615	OG0017093	2	1	1	IPR001054=Adenylyl cyclase class-3/4/guanylyl cyclase (100.0%)
616	OG0017094	2	1	1	IPR000276=G protein-coupled receptor rhodopsin-like (100.0%)
617	OG0017095	2	1	1	None
618	OG0017096	2	1	1	None
619	OG0017097	2	1	1	IPR001507=Zona pellucida domain (100.0%)
620	OG0017098	2	1	1	None
621	OG0017099	2	1	1	None
622	OG0017100	2	1	1	None
623	OG0017101	2	1	1	None
624	OG0017102	2	1	1	None
625	OG0017103	2	1	1	None
626	OG0017104	2	1	1	None
627	OG0017105	2	1	1	None
628	OG0017106	2	1	1	None
629	OG0017107	2	1	1	None
630	OG0017108	2	1	1	None
631	OG0017109	2	1	1	None
632	OG0017110	2	1	1	None
633	OG0017111	2	1	1	None
634	OG0017112	2	1	1	None
635	OG0017113	2	1	1	None
636	OG0017114	2	1	1	None
637	OG0017115	2	1	1	None
638	OG0017116	2	1	1	None
639	OG0017117	2	1	1	IPR002999=Tudor domain (100.0%)
640	OG0017118	2	1	1	None
641	OG0017119	2	1	1	None
642	OG0017120	2	1	1	None
643	OG0017121	2	1	1	IPR000210=BTB/POZ domain (100.0%)
644	OG0017122	2	1	1	None
645	OG0017123	2	1	1	IPR001054=Adenylyl cyclase class-3/4/guanylyl cyclase (100.0%);IPR001245=Serine-threonine/tyrosine-protein kinase catalytic domain (100.0%);IPR001828=Receptor ligand binding region (100.0%)
646	OG0017124	2	1	1	None
647	OG0017125	2	1	1	None
648	OG0017126	2	1	1	None
649	OG0017127	2	1	1	None
650	OG0017128	2	1	1	None
651	OG0017129	2	1	1	None
652	OG0017130	2	1	1	IPR001247=Exoribonuclease phosphorolytic domain 1 (100.0%)
653	OG0017131	2	1	1	None
654	OG0017132	2	1	1	None
655	OG0017133	2	1	1	IPR001245=Serine-threonine/tyrosine-protein kinase catalytic domain (100.0%);IPR001828=Receptor ligand binding region (100.0%)
656	OG0017134	2	1	1	IPR005821=Ion transport domain (100.0%)
657	OG0017135	2	1	1	None
658	OG0017136	2	1	1	IPR032707=MYCBP-associated protein (100.0%)
659	OG0017137	2	1	1	IPR000719=Protein kinase domain (100.0%)
660	OG0017138	2	1	1	IPR003018=GAF domain (100.0%);IPR002073=3'5'-cyclic nucleotide phosphodiesterase catalytic domain (100.0%)
661	OG0017139	2	1	1	IPR011705=BTB/Kelch-associated (100.0%)
662	OG0017140	2	1	1	IPR025593=Growth arrest-specific protein 8 (100.0%)
663	OG0017141	2	1	1	None
664	OG0017142	2	1	1	IPR001245=Serine-threonine/tyrosine-protein kinase catalytic domain (100.0%);IPR001828=Receptor ligand binding region (100.0%)
665	OG0017143	2	1	1	None
666	OG0017144	2	1	1	None
667	OG0017145	2	1	1	None
668	OG0017146	2	1	1	None
669	OG0017147	2	1	1	None
670	OG0017148	2	1	1	None
671	OG0017149	2	1	1	None
672	OG0017150	2	1	1	None
673	OG0017151	2	1	1	IPR001564=Nucleoside diphosphate kinase (100.0%)
674	OG0017152	2	1	1	IPR000210=BTB/POZ domain (100.0%)
675	OG0017153	2	1	1	None
676	OG0017154	2	1	1	None
677	OG0017155	2	1	1	IPR002554=Protein phosphatase 2A regulatory B subunit B56 (100.0%)
678	OG0017156	2	1	1	IPR007858=Dpy-30 motif (100.0%);IPR001564=Nucleoside diphosphate kinase (100.0%)
679	OG0017157	2	1	1	None
680	OG0017158	2	1	1	None
681	OG0017159	2	1	1	None
682	OG0017160	2	1	1	IPR023796=Serpin domain (100.0%)
683	OG0017161	2	1	1	None
684	OG0017162	2	1	1	None
685	OG0017163	2	1	1	IPR002625=Smr domain (100.0%)
686	OG0017164	2	1	1	None
687	OG0017165	2	1	1	None
688	OG0017166	2	1	1	None
689	OG0017167	2	1	1	None
690	OG0017168	2	1	1	IPR004181=Zinc finger MIZ-type (100.0%)
691	OG0017169	2	1	1	None
692	OG0017170	2	1	1	None
693	OG0017171	2	1	1	IPR031514=Aberrant zinc-finger domain (100.0%)
694	OG0017172	2	1	1	None
695	OG0017174	2	1	1	None
696	OG0017175	2	1	1	IPR001611=Leucine-rich repeat (100.0%);IPR002172=Low-density lipoprotein (LDL) receptor class A repeat (100.0%)
697	OG0017176	2	1	1	None
698	OG0017177	2	1	1	IPR018392=LysM domain (100.0%)
699	OG0017178	2	1	1	None
700	OG0017179	2	1	1	None
701	OG0017180	2	1	1	None
702	OG0017181	2	1	1	IPR003150=DNA-binding RFX-type winged-helix domain (100.0%)
703	OG0017182	2	1	1	None
704	OG0017183	2	1	1	None
705	OG0017184	2	1	1	None
706	OG0017185	2	1	1	IPR000008=C2 domain (100.0%)
707	OG0017186	2	1	1	None
708	OG0017187	2	1	1	None
709	OG0017188	2	1	1	None	CAHS1
710	OG0017189	2	1	1	None
711	OG0017190	2	1	1	IPR001506=Peptidase M12A (100.0%)
712	OG0017191	2	1	1	None
713	OG0017192	2	1	1	None
714	OG0017193	2	1	1	IPR005821=Ion transport domain (100.0%);IPR003131=Potassium channel tetramerisation-type BTB domain (100.0%)
715	OG0017194	2	1	1	None
716	OG0017195	2	1	1	None
717	OG0017196	2	1	1	None
718	OG0017197	2	1	1	IPR000403=Phosphatidylinositol 3-/4-kinase catalytic domain (100.0%);IPR003152=FATC domain (100.0%)
719	OG0017198	2	1	1	None
720	OG0017199	2	1	1	IPR000276=G protein-coupled receptor rhodopsin-like (100.0%)
721	OG0017200	2	1	1	None
722	OG0017201	2	1	1	None
723	OG0017202	2	1	1	None
724	OG0017203	2	1	1	IPR013099=Potassium channel domain (100.0%)
725	OG0017204	2	1	1	None
726	OG0017205	2	1	1	None
727	OG0017206	2	1	1	None
728	OG0017207	2	1	1	IPR001628=Zinc finger nuclear hormone receptor-type (100.0%);IPR000536=Nuclear hormone receptor ligand-binding domain (100.0%)
729	OG0017208	2	1	1	IPR003032=Ryanodine receptor Ryr (100.0%)
730	OG0017209	2	1	1	IPR019528=Pericentrin/AKAP-450 centrosomal targeting domain (100.0%)
731	OG0017210	2	1	1	None
732	OG0017211	2	1	1	None
733	OG0017212	2	1	1	None
734	OG0017213	2	1	1	None
735	OG0017214	2	1	1	IPR000719=Protein kinase domain (100.0%)
736	OG0017215	2	1	1	None
737	OG0017216	2	1	1	None
738	OG0017217	2	1	1	None
739	OG0017218	2	1	1	None
740	OG0017219	2	1	1	None
741	OG0017220	2	1	1	None
742	OG0017221	2	1	1	IPR001356=Homeobox domain (100.0%)
743	OG0017222	2	1	1	IPR006652=Kelch repeat type 1 (100.0%)
744	OG0017223	2	1	1	IPR000210=BTB/POZ domain (100.0%)
745	OG0017224	2	1	1	None
746	OG0017226	2	1	1	None
747	OG0017227	2	1	1	None
748	OG0017228	2	1	1	None
749	OG0017229	2	1	1	None
750	OG0017230	2	1	1	None
751	OG0017231	2	1	1	None
752	OG0017232	2	1	1	None
753	OG0017233	2	1	1	IPR008805=RIB43A (100.0%)
754	OG0017234	2	1	1	None
755	OG0017235	2	1	1	None
756	OG0017237	2	1	1	None
757	OG0017238	2	1	1	None
758	OG0017240	2	1	1	None
759	OG0017241	2	1	1	None
760	OG0017242	2	1	1	None
761	OG0017244	2	1	1	IPR032013=Protein of unknown function DUF4795 (100.0%)
762	OG0017245	2	1	1	None
763	OG0017246	2	1	1	None
764	OG0017247	2	1	1	None
765	OG0017248	2	1	1	None
766	OG0017249	2	1	1	IPR001128=Cytochrome P450 (100.0%)
767	OG0017250	2	1	1	None
768	OG0017251	2	1	1	None
769	OG0017252	2	1	1	None
770	OG0017253	2	1	1	IPR018379=BEN domain (100.0%)
771	OG0017254	2	1	1	None
772	OG0017255	2	1	1	None
773	OG0017256	2	1	1	None
774	OG0017257	2	1	1	None
775	OG0017258	2	1	1	None
776	OG0017259	2	1	1	None
777	OG0017260	2	1	1	None
778	OG0017261	2	1	1	IPR019282=Domain of unknown function DUF2329 (100.0%)
779	OG0017262	2	1	1	None
780	OG0017264	2	1	1	None
781	OG0017265	2	1	1	None
782	OG0017266	2	1	1	None
783	OG0017267	2	1	1	None
784	OG0017268	2	1	1	None
785	OG0017269	2	1	1	None
786	OG0017270	2	1	1	None
787	OG0017271	2	1	1	None
788	OG0017272	2	1	1	None
789	OG0017273	2	1	1	IPR011598=Myc-type basic helix-loop-helix (bHLH) domain (100.0%)
790	OG0017274	2	1	1	IPR006035=Ureohydrolase (100.0%)
791	OG0017275	2	1	1	None
792	OG0017276	2	1	1	IPR006202=Neurotransmitter-gated ion-channel ligand-binding domain (100.0%)
793	OG0017277	2	1	1	None
794	OG0017278	2	1	1	IPR002659=Glycosyl transferase family 31 (100.0%)
795	OG0017279	2	1	1	None
796	OG0017280	2	1	1	IPR021255=Putative auto-transporter adhesin head GIN domain (100.0%)
797	OG0017281	2	1	1	None
798	OG0017282	2	1	1	None
799	OG0017283	2	1	1	None
800	OG0017284	2	1	1	IPR003165=Piwi domain (100.0%)
801	OG0017285	2	1	1	None
802	OG0017286	2	1	1	None
803	OG0017287	2	1	1	None
804	OG0017288	2	1	1	None
805	OG0017289	2	1	1	None
806	OG0017290	2	1	1	None
807	OG0017291	2	1	1	None
808	OG0017292	2	1	1	IPR011701=Major facilitator superfamily (100.0%)
809	OG0017293	2	1	1	None
810	OG0017294	2	1	1	IPR001254=Serine proteases trypsin domain (100.0%)
811	OG0017295	2	1	1	None
812	OG0017296	2	1	1	None
813	OG0017297	2	1	1	None
814	OG0017298	2	1	1	None
815	OG0017299	2	1	1	None
816	OG0017300	2	1	1	IPR011545=DEAD/DEAH box helicase domain (100.0%);IPR001650=Helicase C-terminal (100.0%)
817	OG0017301	2	1	1	None
818	OG0017302	2	1	1	IPR026120=Transmembrane protein 11 (100.0%)
819	OG0017303	2	1	1	None
820	OG0017304	2	1	1	None
821	OG0017305	2	1	1	None
822	OG0017306	2	1	1	None
823	OG0017307	2	1	1	None
824	OG0017308	2	1	1	None
825	OG0017309	2	1	1	None
826	OG0017310	2	1	1	None
827	OG0017311	2	1	1	None
828	OG0017312	2	1	1	None
829	OG0017313	2	1	1	IPR001254=Serine proteases trypsin domain (100.0%)
830	OG0017314	2	1	1	None
831	OG0017315	2	1	1	IPR001254=Serine proteases trypsin domain (100.0%)
832	OG0017316	2	1	1	None
833	OG0017317	2	1	1	None
834	OG0017318	2	1	1	None
835	OG0017319	2	1	1	None
836	OG0017320	2	1	1	None
837	OG0017321	2	1	1	None
838	OG0017322	2	1	1	IPR001506=Peptidase M12A (100.0%)
839	OG0017323	2	1	1	IPR001506=Peptidase M12A (100.0%)
840	OG0017324	2	1	1	None
841	OG0017325	2	1	1	IPR006588=Peptide N glycanase PAW domain (100.0%)
842	OG0017326	2	1	1	None
843	OG0017327	2	1	1	None
844	OG0017328	2	1	1	IPR018499=Tetraspanin/Peripherin (100.0%)
845	OG0017329	2	1	1	None
846	OG0017330	2	1	1	None
847	OG0017331	2	1	1	None
848	OG0017332	2	1	1	None
849	OG0017333	2	1	1	IPR000504=RNA recognition motif domain (100.0%)
850	OG0017334	2	1	1	None
851	OG0017335	2	1	1	None
852	OG0017336	2	1	1	None
853	OG0017337	2	1	1	None
854	OG0017338	2	1	1	IPR013809=ENTH domain (100.0%)
855	OG0017339	2	1	1	None
856	OG0017340	2	1	1	None
857	OG0017341	2	1	1	None
858	OG0017342	2	1	1	None
859	OG0017343	2	1	1	None
860	OG0017344	2	1	1	None
861	OG0017345	2	1	1	None
862	OG0017346	2	1	1	None
863	OG0017347	2	1	1	None
864	OG0017348	2	1	1	None
865	OG0017349	2	1	1	None
866	OG0017350	2	1	1	None
867	OG0017351	2	1	1	None
868	OG0017352	2	1	1	None
869	OG0017353	2	1	1	None
870	OG0017354	2	1	1	None
871	OG0017355	2	1	1	None
872	OG0017356	2	1	1	IPR005817=Wnt (100.0%)
873	OG0017357	2	1	1	None
874	OG0017358	2	1	1	None
875	OG0017359	2	1	1	None
876	OG0017360	2	1	1	None
877	OG0017361	2	1	1	None
878	OG0017362	2	1	1	IPR000210=BTB/POZ domain (100.0%)
879	OG0017363	2	1	1	None
880	OG0017364	2	1	1	None
881	OG0017365	2	1	1	None
882	OG0017366	2	1	1	IPR023410=14-3-3 domain (100.0%)
883	OG0017367	2	1	1	None
884	OG0017368	2	1	1	None
885	OG0017369	2	1	1	None
886	OG0017370	2	1	1	None
887	OG0017371	2	1	1	None
888	OG0017372	2	1	1	None
889	OG0017373	2	1	1	None
890	OG0017374	2	1	1	None
891	OG0017375	2	1	1	None
892	OG0017376	2	1	1	None
893	OG0017377	2	1	1	None
894	OG0017378	2	1	1	None
895	OG0017379	2	1	1	None
896	OG0017380	2	1	1	None
897	OG0017381	2	1	1	None
898	OG0017382	2	1	1	None
899	OG0017383	2	1	1	None
900	OG0017385	2	1	1	IPR005828=Major facilitator sugar transporter-like (100.0%)
901	OG0017386	2	1	1	None
902	OG0017388	2	1	1	IPR001806=Small GTPase superfamily (100.0%)
903	OG0017389	2	1	1	None
904	OG0017390	2	1	1	None
905	OG0017391	2	1	1	None
906	OG0017392	2	1	1	None
907	OG0017393	2	1	1	None
908	OG0017394	2	1	1	None
909	OG0017395	2	1	1	None
910	OG0017396	2	1	1	None
911	OG0017397	2	1	1	None
912	OG0017398	2	1	1	None
913	OG0017399	2	1	1	None
914	OG0017400	2	1	1	None
915	OG0017401	2	1	1	IPR001254=Serine proteases trypsin domain (100.0%)
916	OG0017402	2	1	1	None
917	OG0017403	2	1	1	IPR001254=Serine proteases trypsin domain (100.0%)
918	OG0017404	2	1	1	IPR018143=Folate receptor-like (100.0%)
919	OG0017406	2	1	1	IPR001372=Dynein light chain type 1/2 (100.0%)
920	OG0017407	2	1	1	IPR013883=Transcription factor Iwr1 (100.0%)
921	OG0017408	2	1	1	None
922	OG0017409	2	1	1	None
923	OG0017410	2	1	1	None
924	OG0017411	2	1	1	IPR001254=Serine proteases trypsin domain (100.0%)
925	OG0017412	2	1	1	None
926	OG0017413	2	1	1	None
927	OG0017414	2	1	1	None
928	OG0017415	2	1	1	None
929	OG0017416	2	1	1	None
930	OG0017417	2	1	1	None
931	OG0017418	2	1	1	None
932	OG0017419	2	1	1	None
933	OG0017420	2	1	1	None
934	OG0017421	2	1	1	None
935	OG0017422	2	1	1	None
936	OG0017423	2	1	1	None
937	OG0017424	2	1	1	None
938	OG0017425	2	1	1	IPR018392=LysM domain (100.0%)
939	OG0017426	2	1	1	None
940	OG0017427	2	1	1	None
941	OG0017428	2	1	1	IPR000210=BTB/POZ domain (100.0%)
942	OG0017429	2	1	1	None
943	OG0017430	2	1	1	None
944	OG0017431	2	1	1	None
945	OG0017432	2	1	1	None
946	OG0017433	2	1	1	IPR001841=Zinc finger RING-type (100.0%)
947	OG0017434	2	1	1	None
948	OG0017435	2	1	1	IPR001254=Serine proteases trypsin domain (100.0%)
949	OG0017436	2	1	1	None
950	OG0017437	2	1	1	None
951	OG0017438	2	1	1	None
952	OG0017439	2	1	1	IPR018499=Tetraspanin/Peripherin (100.0%)
953	OG0017440	2	1	1	None
954	OG0017441	2	1	1	IPR031737=Condensin-2 complex subunit H2 C-terminal (100.0%)
955	OG0017442	2	1	1	None
956	OG0017444	2	1	1	None
957	OG0017445	2	1	1	None
958	OG0017446	2	1	1	None
959	OG0017447	2	1	1	None
960	OG0017448	2	1	1	None
961	OG0017449	2	1	1	IPR002557=Chitin binding domain (100.0%)
962	OG0017450	2	1	1	None
963	OG0017451	2	1	1	None
964	OG0017452	2	1	1	None
965	OG0017453	2	1	1	None
966	OG0017454	2	1	1	None
967	OG0017455	2	1	1	None
968	OG0017456	2	1	1	None
969	OG0017457	2	1	1	None
970	OG0017458	2	1	1	IPR022234=Protein of unknown function DUF3759 (100.0%)
971	OG0017459	2	1	1	None
972	OG0017460	2	1	1	IPR003150=DNA-binding RFX-type winged-helix domain (100.0%)
973	OG0017461	2	1	1	None
974	OG0017462	2	1	1	None
975	OG0017463	2	1	1	None
976	OG0017464	2	1	1	IPR003959=ATPase AAA-type core (100.0%)
977	OG0017465	2	1	1	None
978	OG0017466	2	1	1	None
979	OG0017467	2	1	1	None
980	OG0017468	2	1	1	None
981	OG0017469	2	1	1	None
982	OG0017470	2	1	1	None
983	OG0017471	2	1	1	IPR024970=Maelstrom domain (100.0%)
984	OG0017472	2	1	1	None
985	OG0017473	2	1	1	IPR011022=Arrestin C-terminal-like domain (100.0%);IPR011021=Arrestin-like N-terminal (100.0%)
986	OG0017474	2	1	1	IPR000276=G protein-coupled receptor rhodopsin-like (100.0%)
987	OG0017475	2	1	1	IPR009991=Dynactin subunit p22 (100.0%)
988	OG0017476	2	1	1	IPR001054=Adenylyl cyclase class-3/4/guanylyl cyclase (100.0%)
989	OG0017477	2	1	1	None
990	OG0017478	2	1	1	None
991	OG0017479	2	1	1	IPR001506=Peptidase M12A (100.0%)
992	OG0017480	2	1	1	None
993	OG0017481	2	1	1	None
994	OG0017482	2	1	1	None
995	OG0017483	2	1	1	IPR001590=Peptidase M12B ADAM/reprolysin (100.0%);IPR002870=Peptidase M12B propeptide (100.0%)
996	OG0017484	2	1	1	None
997	OG0017485	2	1	1	None
998	OG0017486	2	1	1	IPR001040=Translation Initiation factor eIF- 4e (100.0%)
999	OG0017487	2	1	1	None
1000	OG0017488	2	1	1	None
1001	OG0017489	2	1	1	IPR005018=DOMON domain (100.0%)
1002	OG0017491	2	1	1	IPR002939=Chaperone DnaJ C-terminal (100.0%);IPR001623=DnaJ domain (100.0%)
1003	OG0017492	2	1	1	None
1004	OG0017493	2	1	1	IPR001480=Bulb-type lectin domain (100.0%)
1005	OG0017494	2	1	1	None
1006	OG0017495	2	1	1	None
1007	OG0017496	2	1	1	IPR001680=WD40 repeat (100.0%);IPR022052=Histone-binding protein RBBP4 N-terminal (100.0%)
1008	OG0017497	2	1	1	None
1009	OG0017498	2	1	1	None
1010	OG0017499	2	1	1	None
1011	OG0017500	2	1	1	None
1012	OG0017501	2	1	1	IPR031737=Condensin-2 complex subunit H2 C-terminal (100.0%)
1013	OG0017502	2	1	1	None
1014	OG0017503	2	1	1	IPR018487=Hemopexin-like repeats (100.0%);IPR001506=Peptidase M12A (100.0%)
1015	OG0017504	2	1	1	None
1016	OG0017505	2	1	1	None
1017	OG0017506	2	1	1	IPR002659=Glycosyl transferase family 31 (100.0%)
1018	OG0017507	2	1	1	None
1019	OG0017508	2	1	1	None
1020	OG0017509	2	1	1	None
1021	OG0017510	2	1	1	None
1022	OG0017512	2	1	1	None
1023	OG0017513	2	1	1	None
1024	OG0017514	2	1	1	None
1025	OG0017516	2	1	1	None
1026	OG0017517	2	1	1	None
1027	OG0017518	2	1	1	None
1028	OG0017519	2	1	1	None
1029	OG0017520	2	1	1	IPR007905=Emopamil-binding protein (100.0%)
1030	OG0017521	2	1	1	None
1031	OG0017522	2	1	1	IPR002716=PIN domain (100.0%)
1032	OG0017523	2	1	1	None
1033	OG0017524	2	1	1	None
1034	OG0017525	2	1	1	None
1035	OG0017526	2	1	1	None
1036	OG0017527	2	1	1	None
1037	OG0017528	2	1	1	None
1038	OG0017529	2	1	1	None
1039	OG0017530	2	1	1	None
1040	OG0017531	2	1	1	None
1041	OG0017532	2	1	1	IPR000716=Thyroglobulin type-1 (100.0%)
1042	OG0017533	2	1	1	None
1043	OG0017534	2	1	1	None
1044	OG0017535	2	1	1	None
1045	OG0017536	2	1	1	None
1046	OG0017537	2	1	1	None
1047	OG0017538	2	1	1	None
1048	OG0017539	2	1	1	None
1049	OG0017540	2	1	1	IPR001245=Serine-threonine/tyrosine-protein kinase catalytic domain (100.0%)
1050	OG0017541	2	1	1	None
1051	OG0017542	2	1	1	IPR027961=Protein of unknown function DUF4442 (100.0%)
1052	OG0017543	2	1	1	None
1053	OG0017544	2	1	1	None
1054	OG0017545	2	1	1	None
1055	OG0017546	2	1	1	IPR001506=Peptidase M12A (100.0%)
1056	OG0017547	2	1	1	None
1057	OG0017548	2	1	1	None
1058	OG0017549	2	1	1	None
1059	OG0017550	2	1	1	None
1060	OG0017551	2	1	1	IPR001245=Serine-threonine/tyrosine-protein kinase catalytic domain (100.0%)
1061	OG0017552	2	1	1	None
1062	OG0017553	2	1	1	None
1063	OG0017554	2	1	1	IPR010441=CH-like domain in sperm protein (100.0%)
1064	OG0017555	2	1	1	None
1065	OG0017556	2	1	1	None
1066	OG0017557	2	1	1	None
1067	OG0017558	2	1	1	IPR004352=Glycoside-hydrolase family GH114 TIM-barrel domain (100.0%)
1068	OG0017559	2	1	1	IPR006011=Syntaxin N-terminal domain (100.0%)
1069	OG0017560	2	1	1	IPR002083=MATH/TRAF domain (100.0%);IPR000210=BTB/POZ domain (100.0%)
1070	OG0017561	2	1	1	IPR001054=Adenylyl cyclase class-3/4/guanylyl cyclase (100.0%);IPR013587=Nitrate/nitrite sensing protein (100.0%)
1071	OG0017562	2	1	1	IPR015590=Aldehyde dehydrogenase domain (100.0%)
1072	OG0017563	2	1	1	None
1073	OG0017564	2	1	1	None
1074	OG0017566	2	1	1	None
1075	OG0017567	2	1	1	None
1076	OG0017568	2	1	1	None
1077	OG0017569	2	1	1	None
1078	OG0017570	2	1	1	None
1079	OG0017571	2	1	1	None
1080	OG0017573	2	1	1	None
1081	OG0017574	2	1	1	None
1082	OG0017575	2	1	1	IPR000210=BTB/POZ domain (100.0%)
1083	OG0017576	2	1	1	None
1084	OG0017577	2	1	1	IPR002350=Kazal domain (100.0%)
1085	OG0017578	2	1	1	None
1086	OG0017579	2	1	1	None
1087	OG0017580	2	1	1	None
1088	OG0017581	2	1	1	IPR006202=Neurotransmitter-gated ion-channel ligand-binding domain (100.0%)
1089	OG0017583	2	1	1	IPR027962=Protein of unknown function DUF4590 (100.0%)
1090	OG0017584	2	1	1	None
1091	OG0017585	2	1	1	None
1092	OG0017588	2	1	1	None
1093	OG0017589	2	1	1	None
1094	OG0017590	2	1	1	None
1095	OG0017591	2	1	1	IPR000719=Protein kinase domain (100.0%)
1096	OG0017592	2	1	1	IPR001254=Serine proteases trypsin domain (100.0%)
1097	OG0017593	2	1	1	IPR007274=Ctr copper transporter (100.0%)
1098	OG0017594	2	1	1	None
1099	OG0017595	2	1	1	IPR002515=Zinc finger C2HC-type (100.0%);IPR019787=Zinc finger PHD-finger (100.0%);IPR002717=Histone acetyltransferase domain MYST-type (100.0%)
1100	OG0017596	2	1	1	None
1101	OG0017597	2	1	1	None
1102	OG0017598	2	1	1	IPR001254=Serine proteases trypsin domain (100.0%)
1103	OG0017599	2	1	1	None
1104	OG0017600	2	1	1	None
1105	OG0017601	2	1	1	IPR006202=Neurotransmitter-gated ion-channel ligand-binding domain (100.0%)
1106	OG0017602	2	1	1	None
1107	OG0017603	2	1	1	None
1108	OG0017604	2	1	1	None
1109	OG0017605	2	1	1	IPR005828=Major facilitator sugar transporter-like (100.0%)
1110	OG0017606	2	1	1	IPR028172=Intraflagellar transport protein 20 (100.0%)
1111	OG0017607	2	1	1	None
1112	OG0017608	2	1	1	None
1113	OG0017609	2	1	1	IPR001611=Leucine-rich repeat (100.0%)
1114	OG0017610	2	1	1	None
1115	OG0017611	2	1	1	None
1116	OG0017612	2	1	1	None
1117	OG0017613	2	1	1	None
1118	OG0017614	2	1	1	IPR001506=Peptidase M12A (100.0%)
1119	OG0017615	2	1	1	None
1120	OG0017616	2	1	1	None
1121	OG0017617	2	1	1	IPR024989=Major facilitator superfamily associated domain (100.0%)
1122	OG0017618	2	1	1	None
1123	OG0017619	2	1	1	IPR022735=Domain of unknown function DUF3585 (100.0%)
1124	OG0017620	2	1	1	None
1125	OG0017621	2	1	1	None
1126	OG0017622	2	1	1	IPR002172=Low-density lipoprotein (LDL) receptor class A repeat (100.0%);IPR001254=Serine proteases trypsin domain (100.0%)
1127	OG0017623	2	1	1	IPR000276=G protein-coupled receptor rhodopsin-like (100.0%)
1128	OG0017624	2	1	1	None
1129	OG0017625	2	1	1	None
1130	OG0017626	2	1	1	None
1131	OG0017627	2	1	1	IPR018629=XK-related protein (100.0%)
1132	OG0017628	2	1	1	None
1133	OG0017629	2	1	1	None
1134	OG0017630	2	1	1	None
1135	OG0017631	2	1	1	None
1136	OG0017632	2	1	1	None
1137	OG0017633	2	1	1	IPR002716=PIN domain (100.0%)
1138	OG0017634	2	1	1	None
1139	OG0017635	2	1	1	None
1140	OG0017636	2	1	1	None
1141	OG0017637	2	1	1	None
1142	OG0017638	2	1	1	None
1143	OG0017639	2	1	1	None
1144	OG0017640	2	1	1	None
1145	OG0017641	2	1	1	None
1146	OG0017642	2	1	1	IPR001506=Peptidase M12A (100.0%)
1147	OG0017643	2	1	1	IPR015418=Chromatin modification-related protein Eaf6 (100.0%)
1148	OG0017644	2	1	1	None
1149	OG0017645	2	1	1	None
1150	OG0017646	2	1	1	None
1151	OG0017647	2	1	1	None
1152	OG0017648	2	1	1	None
1153	OG0017649	2	1	1	IPR000772=Ricin B lectin domain (100.0%)
1154	OG0017650	2	1	1	IPR001214=SET domain (100.0%);IPR007728=Pre-SET domain (100.0%)
1155	OG0017651	2	1	1	None
1156	OG0017653	2	1	1	None
1157	OG0017654	2	1	1	None
1158	OG0017655	2	1	1	None
1159	OG0017656	2	1	1	None
1160	OG0017657	2	1	1	None
1161	OG0017658	2	1	1	None
1162	OG0017659	2	1	1	None
1163	OG0017660	2	1	1	IPR013684=Mitochondrial Rho-like (100.0%)
1164	OG0017661	2	1	1	IPR000276=G protein-coupled receptor rhodopsin-like (100.0%)
1165	OG0017662	2	1	1	None
1166	OG0017663	2	1	1	None
1167	OG0017664	2	1	1	None
1168	OG0017665	2	1	1	None
1169	OG0017666	2	1	1	None
1170	OG0017667	2	1	1	None
1171	OG0017668	2	1	1	None
1172	OG0017669	2	1	1	None
1173	OG0017670	2	1	1	None
1174	OG0017671	2	1	1	IPR001611=Leucine-rich repeat (100.0%)
1175	OG0017672	2	1	1	IPR000276=G protein-coupled receptor rhodopsin-like (100.0%)
1176	OG0017673	2	1	1	IPR001025=Bromo adjacent homology (BAH) domain (100.0%)
1177	OG0017674	2	1	1	None
1178	OG0017675	2	1	1	None
1179	OG0017676	2	1	1	None
1180	OG0017677	2	1	1	None
1181	OG0017678	2	1	1	None
1182	OG0017679	2	1	1	None
1183	OG0017680	2	1	1	None
1184	OG0017681	2	1	1	None
1185	OG0017682	2	1	1	None
1186	OG0017684	2	1	1	IPR006588=Peptide N glycanase PAW domain (100.0%)
1187	OG0017685	2	1	1	None
1188	OG0017686	2	1	1	None
1189	OG0017687	2	1	1	IPR006202=Neurotransmitter-gated ion-channel ligand-binding domain (100.0%);IPR006029=Neurotransmitter-gated ion-channel transmembrane domain (100.0%)
1190	OG0017688	2	1	1	IPR002018=Carboxylesterase type B (100.0%)
1191	OG0017689	2	1	1	IPR000210=BTB/POZ domain (100.0%)
1192	OG0017690	2	1	1	None
1193	OG0017691	2	1	1	IPR015894=Guanylate-binding protein N-terminal (100.0%)
1194	OG0017692	2	1	1	None
1195	OG0017693	2	1	1	None
1196	OG0017694	2	1	1	None
1197	OG0017695	2	1	1	None
1198	OG0017696	2	1	1	None
1199	OG0017697	2	1	1	None
1200	OG0017698	2	1	1	None
1201	OG0017699	2	1	1	None
1202	OG0017700	2	1	1	None
1203	OG0017701	2	1	1	None
1204	OG0017702	2	1	1	None
1205	OG0017703	2	1	1	None
1206	OG0017704	2	1	1	None
1207	OG0017705	2	1	1	IPR001628=Zinc finger nuclear hormone receptor-type (100.0%)
1208	OG0017706	2	1	1	None
1209	OG0017707	2	1	1	None
1210	OG0017708	2	1	1	None
1211	OG0017709	2	1	1	None
1212	OG0017710	2	1	1	None
1213	OG0017711	2	1	1	None
1214	OG0017712	2	1	1	None	CAHS2
1215	OG0017713	2	1	1	None
1216	OG0017714	2	1	1	None
1217	OG0017715	2	1	1	None
1218	OG0017716	2	1	1	None
1219	OG0017717	2	1	1	None
1220	OG0017718	2	1	1	None
1221	OG0017719	2	1	1	None
1222	OG0017720	2	1	1	None
1223	OG0017721	2	1	1	None
1224	OG0017722	2	1	1	None
1225	OG0017723	2	1	1	None
1226	OG0017724	2	1	1	None
1227	OG0017725	2	1	1	None
1228	OG0017726	2	1	1	None
1229	OG0017727	2	1	1	None
1230	OG0017728	2	1	1	None
1231	OG0017729	2	1	1	None
1232	OG0017730	2	1	1	None
1233	OG0017731	2	1	1	None
1234	OG0017732	2	1	1	None
1235	OG0017733	2	1	1	None
1236	OG0017734	2	1	1	None
1237	OG0017735	2	1	1	None
1238	OG0017736	2	1	1	None
1239	OG0017737	2	1	1	None
1240	OG0017738	2	1	1	None
1241	OG0017739	2	1	1	None
1242	OG0017740	2	1	1	None
1243	OG0017741	2	1	1	None
1244	OG0017742	2	1	1	IPR013766=Thioredoxin domain (100.0%)
1245	OG0017743	2	1	1	None
1246	OG0017744	2	1	1	None
1247	OG0017745	2	1	1	None
1248	OG0017746	2	1	1	None
1249	OG0017747	2	1	1	None
1250	OG0017748	2	1	1	None
1251	OG0017750	2	1	1	None
1252	OG0017751	2	1	1	None
1253	OG0017752	2	1	1	None
1254	OG0017753	2	1	1	None
1255	OG0017754	2	1	1	None
1256	OG0017755	2	1	1	None
1257	OG0017756	2	1	1	None
1258	OG0017757	2	1	1	None
1259	OG0017758	2	1	1	None
1260	OG0017759	2	1	1	IPR000719=Protein kinase domain (100.0%)
1261	OG0017760	2	1	1	IPR000566=Lipocalin/cytosolic fatty-acid binding domain (100.0%)
1262	OG0017761	2	1	1	None
1263	OG0017762	2	1	1	None
1264	OG0017763	2	1	1	IPR002164=Nucleosome assembly protein (NAP) (100.0%)
1265	OG0017764	2	1	1	None
1266	OG0017765	2	1	1	None
1267	OG0017766	2	1	1	IPR001506=Peptidase M12A (100.0%)
1268	OG0017767	2	1	1	IPR002048=EF-hand domain (100.0%)
1269	OG0017768	2	1	1	IPR009244=Mediator complex subunit Med7 (100.0%)
1270	OG0017769	2	1	1	IPR020067=Frizzled domain (100.0%);IPR000539=Frizzled protein (100.0%)
1271	OG0017770	2	1	1	None
1272	OG0017771	2	1	1	None
1273	OG0017772	2	1	1	None
1274	OG0017773	2	1	1	None
1275	OG0017774	2	1	1	None
1276	OG0017775	2	1	1	IPR002223=Pancreatic trypsin inhibitor Kunitz domain (100.0%);IPR005018=DOMON domain (100.0%)
1277	OG0017776	2	1	1	None
1278	OG0017777	2	1	1	None
1279	OG0017778	2	1	1	None
1280	OG0017779	2	1	1	None
1281	OG0017780	2	1	1	None
1282	OG0017781	2	1	1	None
1283	OG0017782	2	1	1	None
1284	OG0017783	2	1	1	None
1285	OG0017784	2	1	1	IPR003610=Carbohydrate-binding module family 5/12 (100.0%)
1286	OG0017785	2	1	1	None
1287	OG0017786	2	1	1	None
1288	OG0017787	2	1	1	None
1289	OG0017788	2	1	1	None
1290	OG0017789	2	1	1	None
1291	OG0017790	2	1	1	IPR021255=Putative auto-transporter adhesin head GIN domain (100.0%)
1292	OG0017791	2	1	1	None
1293	OG0017792	2	1	1	IPR006909=Rad21/Rec8-like protein C-terminal eukaryotic (100.0%);IPR006910=Rad21/Rec8-like protein N-terminal (100.0%)
1294	OG0017793	2	1	1	IPR001054=Adenylyl cyclase class-3/4/guanylyl cyclase (100.0%);IPR001245=Serine-threonine/tyrosine-protein kinase catalytic domain (100.0%)
1295	OG0017794	2	1	1	IPR001372=Dynein light chain type 1/2 (100.0%)
1296	OG0017795	2	1	1	IPR000719=Protein kinase domain (100.0%)
1297	OG0017796	2	1	1	IPR019791=Haem peroxidase animal (100.0%)
1298	OG0017797	2	1	1	None
1299	OG0017798	2	1	1	None
1300	OG0017799	2	1	1	IPR001506=Peptidase M12A (100.0%)
1301	OG0017800	2	1	1	None
1302	OG0017801	2	1	1	None
1303	OG0017802	2	1	1	None
1304	OG0017803	2	1	1	IPR001611=Leucine-rich repeat (100.0%)
1305	OG0017804	2	1	1	IPR002557=Chitin binding domain (100.0%)
1306	OG0017805	2	1	1	None
1307	OG0017806	2	1	1	None
1308	OG0017807	2	1	1	None
1309	OG0017808	2	1	1	IPR004871=Cleavage/polyadenylation specificity factor A subunit C-terminal (100.0%)
1310	OG0017809	2	1	1	IPR001752=Kinesin motor domain (100.0%)
1311	OG0017810	2	1	1	None
1312	OG0017811	2	1	1	None
1313	OG0017812	2	1	1	None
1314	OG0017813	2	1	1	IPR015260=Syntaxin 6 N-terminal (100.0%)
1315	OG0017814	2	1	1	IPR007728=Pre-SET domain (100.0%)
1316	OG0017815	2	1	1	IPR028118=Chibby family (100.0%)
1317	OG0017816	2	1	1	IPR001506=Peptidase M12A (100.0%)
1318	OG0017817	2	1	1	None
1319	OG0017818	2	1	1	None	CAHS2
1320	OG0017819	2	1	1	None
1321	OG0017820	2	1	1	None
1322	OG0017821	2	1	1	None
1323	OG0017823	2	1	1	None
1324	OG0017824	2	1	1	IPR021255=Putative auto-transporter adhesin head GIN domain (100.0%)
1325	OG0017825	2	1	1	None
1326	OG0017826	2	1	1	None
1327	OG0017827	2	1	1	None
1328	OG0017828	2	1	1	None
1329	OG0017829	2	1	1	IPR029779=Protein of unknown function DUF4674 (100.0%)
1330	OG0017830	2	1	1	None
1331	OG0017831	2	1	1	IPR001254=Serine proteases trypsin domain (100.0%)
1332	OG0017832	2	1	1	IPR023210=NADP-dependent oxidoreductase domain (100.0%)
1333	OG0017833	2	1	1	IPR001394=Peptidase C19 ubiquitin carboxyl-terminal hydrolase (100.0%)
1334	OG0017834	2	1	1	None
1335	OG0017835	2	1	1	None
1336	OG0017836	2	1	1	None
1337	OG0017837	2	1	1	None
1338	OG0017838	2	1	1	IPR000504=RNA recognition motif domain (100.0%)
1339	OG0017839	2	1	1	None
1340	OG0017840	2	1	1	IPR000504=RNA recognition motif domain (100.0%)
1341	OG0017841	2	1	1	None
1342	OG0017842	2	1	1	None
1343	OG0017843	2	1	1	None
1344	OG0017844	2	1	1	None
1345	OG0017845	2	1	1	None
1346	OG0017846	2	1	1	None
1347	OG0017847	2	1	1	None
1348	OG0017848	2	1	1	None
1349	OG0017849	2	1	1	None
1350	OG0017850	2	1	1	None
1351	OG0017851	2	1	1	IPR003392=Protein patched/dispatched (100.0%)
1352	OG0017852	2	1	1	None
1353	OG0017853	2	1	1	None
1354	OG0017854	2	1	1	IPR000884=Thrombospondin type-1 (TSP1) repeat (100.0%);IPR002172=Low-density lipoprotein (LDL) receptor class A repeat (100.0%)
1355	OG0017855	2	1	1	None
1356	OG0017857	2	1	1	None
1357	OG0017858	2	1	1	None
1358	OG0017859	2	1	1	None
1359	OG0017860	2	1	1	None
1360	OG0017861	2	1	1	IPR001628=Zinc finger nuclear hormone receptor-type (100.0%)
1361	OG0017862	2	1	1	None
1362	OG0017863	2	1	1	IPR003582=ShKT domain (100.0%);IPR006202=Neurotransmitter-gated ion-channel ligand-binding domain (100.0%)
1363	OG0017864	2	1	1	None
1364	OG0017865	2	1	1	None
1365	OG0017866	2	1	1	IPR002126=Cadherin (100.0%)
1366	OG0017867	2	1	1	None
1367	OG0017868	2	1	1	None
1368	OG0017869	2	1	1	None
1369	OG0017870	2	1	1	None
1370	OG0017871	2	1	1	IPR011515=Shugoshin C-terminal (100.0%)
1371	OG0017872	2	1	1	None
1372	OG0017873	2	1	1	IPR001781=Zinc finger LIM-type (100.0%)
1373	OG0017874	2	1	1	None
1374	OG0017875	2	1	1	None
1375	OG0017876	2	1	1	None
1376	OG0017877	2	1	1	None
1377	OG0017878	2	1	1	None
1378	OG0017879	2	1	1	None
1379	OG0017880	2	1	1	None
1380	OG0017881	2	1	1	None
1381	OG0017883	2	1	1	None
1382	OG0017884	2	1	1	IPR029147=Domain of unknown function DUF4483 (100.0%)
1383	OG0017885	2	1	1	IPR001040=Translation Initiation factor eIF- 4e (100.0%)
1384	OG0017886	2	1	1	None
1385	OG0017887	2	1	1	None
1386	OG0017888	2	1	1	None
1387	OG0017889	2	1	1	None
1388	OG0017890	2	1	1	None
1389	OG0017891	2	1	1	None
1390	OG0017892	2	1	1	None
1391	OG0017893	2	1	1	None
1392	OG0017894	2	1	1	IPR011935=Conserved hypothetical protein CHP02231 (100.0%);IPR025554=Domain of unknown function DUF4140 (100.0%)
1393	OG0017895	2	1	1	IPR001254=Serine proteases trypsin domain (100.0%)
1394	OG0017896	2	1	1	None
1395	OG0017897	2	1	1	None
1396	OG0017898	2	1	1	None
1397	OG0017899	2	1	1	IPR019791=Haem peroxidase animal (100.0%)
1398	OG0017900	2	1	1	None
1399	OG0017901	2	1	1	None
1400	OG0017902	2	1	1	IPR020683=Ankyrin repeat-containing domain (100.0%)
1401	OG0017903	2	1	1	None
1402	OG0017904	2	1	1	None
1403	OG0017905	2	1	1	IPR019791=Haem peroxidase animal (100.0%)
1404	OG0017906	2	1	1	None
1405	OG0017907	2	1	1	IPR004942=Roadblock/LAMTOR2 domain (100.0%)
1406	OG0017909	2	1	1	None
1407	OG0017910	2	1	1	None
1408	OG0017911	2	1	1	None
1409	OG0017912	2	1	1	None
1410	OG0017913	2	1	1	None
1411	OG0017914	2	1	1	None
1412	OG0017915	2	1	1	IPR012312=Haemerythrin-like (100.0%)
1413	OG0017916	2	1	1	IPR018465=Centromere protein Scm3/HJURP (100.0%)
1414	OG0017917	2	1	1	None
1415	OG0017918	2	1	1	None
1416	OG0017919	2	1	1	IPR011705=BTB/Kelch-associated (100.0%)
1417	OG0017920	2	1	1	None
1418	OG0017922	2	1	1	None
1419	OG0017923	2	1	1	None
1420	OG0017924	2	1	1	IPR001254=Serine proteases trypsin domain (100.0%)
1421	OG0017925	2	1	1	None
1422	OG0017926	2	1	1	None
1423	OG0017927	2	1	1	IPR025742=Cleavage stimulation factor subunit 2 hinge domain (100.0%);IPR000504=RNA recognition motif domain (100.0%);IPR026896=Transcription termination and cleavage factor C-terminal domain (100.0%)
1424	OG0017928	2	1	1	None
1425	OG0017929	2	1	1	None
1426	OG0017930	2	1	1	None
1427	OG0017931	2	1	1	None
1428	OG0017932	2	1	1	None
1429	OG0017933	2	1	1	None	CAHS2
1430	OG0017934	2	1	1	None
1431	OG0017935	2	1	1	None
1432	OG0017936	2	1	1	None
1433	OG0017937	2	1	1	None
1434	OG0017938	2	1	1	None
1435	OG0017939	2	1	1	None
1436	OG0017940	2	1	1	None
1437	OG0017942	2	1	1	IPR001506=Peptidase M12A (100.0%)
1438	OG0017943	2	1	1	None
1439	OG0017944	2	1	1	None
1440	OG0017945	2	1	1	None
1441	OG0017946	2	1	1	None
1442	OG0017947	2	1	1	IPR001879=GPCR family 2 extracellular hormone receptor domain (100.0%)
1443	OG0017948	2	1	1	IPR030379=Septin-type guanine nucleotide-binding (G) domain (100.0%)
1444	OG0017949	2	1	1	None
1445	OG0017950	2	1	1	None
1446	OG0017951	2	1	1	None
1447	OG0017952	2	1	1	None
1448	OG0017953	2	1	1	None
1449	OG0017954	2	1	1	None
1450	OG0017955	2	1	1	None
1451	OG0017956	2	1	1	None
1452	OG0017957	2	1	1	None
1453	OG0017958	2	1	1	None
1454	OG0017959	2	1	1	IPR015425=Formin FH2 domain (100.0%)
1455	OG0017960	2	1	1	IPR001245=Serine-threonine/tyrosine-protein kinase catalytic domain (100.0%)
1456	OG0017961	2	1	1	None
1457	OG0017962	2	1	1	IPR032319=Polyribonucleotide 5'-hydroxyl-kinase Clp1 P-loop domain (100.0%)
1458	OG0017963	2	1	1	None
1459	OG0017964	2	1	1	IPR000048=IQ motif EF-hand binding site (100.0%)
1460	OG0017965	2	1	1	None
1461	OG0017966	2	1	1	None
1462	OG0017967	2	1	1	None
1463	OG0017969	2	1	1	None
1464	OG0017970	2	1	1	IPR001388=Synaptobrevin (100.0%)
1465	OG0017971	2	1	1	None
1466	OG0017972	2	1	1	None
1467	OG0017973	2	1	1	None
1468	OG0017974	2	1	1	None
1469	OG0017975	2	1	1	None
1470	OG0017976	2	1	1	IPR003959=ATPase AAA-type core (100.0%)
1471	OG0017977	2	1	1	IPR001040=Translation Initiation factor eIF- 4e (100.0%)
1472	OG0017978	2	1	1	None
1473	OG0017979	2	1	1	IPR018870=Tti2 family (100.0%)
1474	OG0017980	2	1	1	None
1475	OG0017981	2	1	1	None
1476	OG0017982	2	1	1	None
1477	OG0017983	2	1	1	None
1478	OG0017984	2	1	1	None
1479	OG0017986	2	1	1	None
1480	OG0017987	2	1	1	None
1481	OG0017988	2	1	1	None
1482	OG0017989	2	1	1	None
1483	OG0017990	2	1	1	IPR013517=FG-GAP repeat (100.0%);IPR013649=Integrin alpha-2 (100.0%)
1484	OG0017991	2	1	1	None
1485	OG0017992	2	1	1	IPR028265=M-phase-specific PLK1-interacting protein-like (100.0%)
1486	OG0017993	2	1	1	None
