# Supplementary material for: Comparative genomics of the tardigrades Hypsibius dujardini and Ramazzottius varieornatus
Source: PLoS Biol. 2017 Jul 27;15(7):e2002266. doi: 10.1371/journal.pbio.2002266 (PMC5531438; doi:10.1371/journal.pbio.2002266)
Supplement: S9 Data — Functional annotations of the H. dujardini genes found to be differentially expressed under anhydrobiosis, based on InterPro domain matches. The columns in the table are: (1) #cluster_id: cluster identifier summary; (2) cluster_id: cluster identifier (with one line for each domain matched); (3) domain_source: database source of domain model (IPR = InterProScan); (4) domain_id: database identifier for domain model; (5) domain_description: summary description for domain model; (6) protein_count: total number of proteins in the cluster; (7) protein_count_with_domain: number of proteins in the cluster annotated with this domain; (8) HDUJA-DEG: number of H. dujardini members of the cluster that are differentially expressed under anhydrobiosis; (9) HDUJA-DEG-DOMAINS: number of H. dujardini members of the cluster that are differentially expressed under anhydrobiosis that have this domain, and how many copies of the domain each has (e.g. 4x1 means four members have 1 copy each); (10) HDUJA-HGT: number of H. dujardini members of the cluster that are potential HGT candidates; (11) RVARI-DEG: number of R. varieornatus members of the cluster that are differentially expressed under anhydrobiosis; (12) RVARI-DEG-DOMAINS: number of R. varieornatus members of the cluster that are differentially expressed under anhydrobiosis that have this domain, and how many copies of the domain each has (e.g. 4x1 means four members have 1 copy each); (13) proteomes_with_domain_fraction: proportion of all proteomes represented in the cluster where a member has the domain; (14) proteomes_with_domain: proteomes with members in the cluster where that member has the domain. (XLSX) [file pbio.2002266.s026.xlsx]

## Sheet: HDUJA+RVARI.DEGs.IPR
#cluster_id	cluster_id	domain_source	domain_id	domain_description	protein_count	protein_count_with_domain	HDUJA-DEG	HDUJA-DEG-DOMAINS	HDUJA-HGT	RVARI-DEG	RVARI-DEG-DOMAINS	proteomes_with_domain_fraction	proteomes_with_domain
OG0000014	OG0000014	IPR	IPR001128	Cytochrome P450	777	765	4	4x1		5	5x1	1	AGAMB:11/11,AMELL:6/6,APISU:7/7,ASUUM2:4/4,BMALA:2/2,BXYLO:43/43,CELEG:45/45,CLECT:6/6,CTELE:70/70,DMELA:5/5,DPOND:4/4,DPULE:20/20,HDUJA:85/85,ISCAP:60/62,MHAPL:9/9,NVITR:5/5,OBIMA:17/17,PCAUD:74/74,PHUMA:6/6,PMURR:61/64,PPACI:87/88,PXYLO:11/12,RVARI:35/36,SINVI:8/8,SMARI:14/15,TCAST:6/6,TMURI:1/1,TSPIR:1/1,TURTI:62/65
	OG0000014	IPR	IPR022414	ATP:guanido phosphotransferase, catalytic domain	777	1						0.034	RVARI:1/36
	OG0000014	IPR	IPR023798	Ribosomal protein S7 domain	777	1						0.034	PPACI:1/88
	OG0000014	IPR	IPR022413	ATP:guanido phosphotransferase, N-terminal	777	1						0.034	RVARI:1/36
	OG0000014	IPR	IPR001628	Zinc finger, nuclear hormone receptor-type	777	1						0.034	PPACI:1/88
	OG0000014	IPR	IPR019424	Serpentine type 7TM GPCR chemoreceptor Srsx	777	1						0.034	PPACI:1/88
	OG0000014	IPR	IPR002076	ELO family	777	1						0.034	PPACI:1/88
	OG0000014	IPR	IPR006954	Moulting cycle MLT-10-like protein	777	1						0.034	PPACI:1/88
OG0000022	OG0000022	IPR	IPR001245	Serine-threonine/tyrosine-protein kinase catalytic domain	599	543	1	1x1		1	1x1	1	AGAMB:12/12,AMELL:12/13,APISU:15/19,ASUUM2:17/19,BMALA:12/15,BXYLO:12/14,CELEG:27/27,CLECT:10/11,CTELE:43/48,DMELA:11/11,DPOND:10/15,DPULE:57/59,HDUJA:57/65,ISCAP:13/13,MHAPL:9/15,NVITR:12/14,OBIMA:20/23,PCAUD:22/22,PHUMA:10/10,PMURR:24/27,PPACI:20/20,PXYLO:19/22,RVARI:20/20,SINVI:14/16,SMARI:17/18,TCAST:11/11,TMURI:6/7,TSPIR:8/8,TURTI:23/25
	OG0000022	IPR	IPR013098	Immunoglobulin I-set	599	82						0.966	AGAMB:2/12,AMELL:2/13,APISU:4/19,ASUUM2:3/19,BMALA:2/15,BXYLO:2/14,CELEG:2/27,CLECT:3/11,CTELE:5/48,DMELA:2/11,DPOND:2/15,DPULE:2/59,HDUJA:4/65,ISCAP:2/13,MHAPL:2/15,NVITR:2/14,OBIMA:2/23,PCAUD:2/22,PHUMA:3/10,PPACI:1/20,PXYLO:6/22,RVARI:3/20,SINVI:3/16,SMARI:5/18,TCAST:3/11,TMURI:2/7,TSPIR:3/8,TURTI:8/25
	OG0000022	IPR	IPR003961	Fibronectin type III	599	17						0.483	AGAMB:1/12,AMELL:1/13,APISU:1/19,CLECT:1/11,CTELE:2/48,DMELA:1/11,DPOND:1/15,DPULE:1/59,OBIMA:2/23,PHUMA:1/10,PXYLO:2/22,SINVI:1/16,SMARI:1/18,TCAST:1/11
	OG0000022	IPR	IPR000001	Kringle	599	48						0.931	AGAMB:2/12,AMELL:2/13,APISU:2/19,ASUUM2:1/19,BMALA:1/15,BXYLO:1/14,CELEG:1/27,CLECT:2/11,CTELE:2/48,DMELA:2/11,DPOND:1/15,DPULE:3/59,HDUJA:2/65,ISCAP:1/13,MHAPL:1/15,NVITR:2/14,OBIMA:1/23,PCAUD:2/22,PHUMA:2/10,PXYLO:3/22,RVARI:1/20,SINVI:2/16,SMARI:3/18,TCAST:2/11,TMURI:1/7,TSPIR:1/8,TURTI:4/25
	OG0000022	IPR	IPR000998	MAM domain	599	22						0.724	AGAMB:1/12,AMELL:1/13,APISU:2/19,ASUUM2:1/19,BMALA:1/15,BXYLO:1/14,CLECT:1/11,DMELA:1/11,DPULE:1/59,HDUJA:1/65,NVITR:1/14,OBIMA:1/23,PCAUD:1/22,PHUMA:1/10,PXYLO:1/22,RVARI:1/20,SINVI:1/16,SMARI:1/18,TCAST:1/11,TMURI:1/7,TSPIR:1/8
	OG0000022	IPR	IPR020067	Frizzled domain	599	33						0.759	AGAMB:1/12,AMELL:1/13,APISU:2/19,BMALA:1/15,CLECT:1/11,CTELE:2/48,DMELA:1/11,DPULE:3/59,HDUJA:1/65,ISCAP:1/13,MHAPL:1/15,NVITR:1/14,OBIMA:1/23,PCAUD:2/22,PHUMA:2/10,PXYLO:1/22,RVARI:1/20,SINVI:1/16,SMARI:3/18,TCAST:1/11,TSPIR:1/8,TURTI:4/25
	OG0000022	IPR	IPR001480	Bulb-type lectin domain	599	6		1x1				0.034	HDUJA:6/65
	OG0000022	IPR	IPR000757	Glycoside hydrolase family 16	599	9						0.069	HDUJA:5/65,RVARI:4/20
	OG0000022	IPR	IPR013151	Immunoglobulin	599	11						0.379	AGAMB:1/12,AMELL:1/13,APISU:1/19,BMALA:1/15,DMELA:1/11,DPULE:1/59,PXYLO:1/22,SINVI:1/16,SMARI:1/18,TCAST:1/11,TURTI:1/25
	OG0000022	IPR	IPR002909	IPT domain	599	5						0.172	HDUJA:1/65,ISCAP:1/13,OBIMA:1/23,SMARI:1/18,TURTI:1/25
	OG0000022	IPR	IPR001611	Leucine-rich repeat	599	6						0.207	CTELE:1/48,HDUJA:1/65,PCAUD:1/22,PMURR:1/27,RVARI:1/20,TURTI:1/25
	OG0000022	IPR	IPR002172	Low-density lipoprotein (LDL) receptor class A repeat	599	6						0.207	APISU:1/19,CLECT:1/11,NVITR:1/14,PXYLO:1/22,RVARI:1/20,SINVI:1/16
	OG0000022	IPR	IPR003609	PAN/Apple domain	599	2						0.034	HDUJA:2/65
	OG0000022	IPR	IPR007110	Immunoglobulin-like domain	599	4						0.138	APISU:1/19,ASUUM2:1/19,CELEG:1/27,DMELA:1/11
	OG0000022	IPR	IPR001627	Sema domain	599	4						0.138	ASUUM2:1/19,HDUJA:1/65,MHAPL:1/15,TURTI:1/25
	OG0000022	IPR	IPR001506	Peptidase M12A	599	2						0.034	HDUJA:2/65
	OG0000022	IPR	IPR000980	SH2 domain	599	4						0.069	CELEG:3/27,CTELE:1/48
	OG0000022	IPR	IPR001304	C-type lectin-like	599	1						0.034	PPACI:1/20
	OG0000022	IPR	IPR001254	Serine proteases, trypsin domain	599	2						0.034	HDUJA:2/65
	OG0000022	IPR	IPR007237	CD20-like family	599	1						0.034	PCAUD:1/22
	OG0000022	IPR	IPR018499	Tetraspanin/Peripherin	599	1						0.034	TCAST:1/11
	OG0000022	IPR	IPR002347	Short-chain dehydrogenase/reductase SDR	599	1						0.034	HDUJA:1/65
	OG0000022	IPR	IPR003656	Zinc finger, BED-type	599	1						0.034	HDUJA:1/65
	OG0000022	IPR	IPR013106	Immunoglobulin V-set domain	599	1						0.034	DMELA:1/11
	OG0000022	IPR	IPR000859	CUB domain	599	1						0.034	RVARI:1/20
	OG0000022	IPR	IPR000352	Peptide chain release factor class I/class II	599	1						0.034	TMURI:1/7
	OG0000022	IPR	IPR001580	Calreticulin/calnexin	599	1						0.034	TURTI:1/25
	OG0000022	IPR	IPR000334	Glycoside hydrolase, family 45	599	1						0.034	HDUJA:1/65
	OG0000022	IPR	IPR012877	Uncharacterised oxidoreductase Dhs-27	599	1						0.034	MHAPL:1/15
OG0000056	OG0000056	IPR	IPR002557	Chitin binding domain	410	374	10	10x1		7	7x1	0.95	AGAMB:10/11,AMELL:13/13,APISU:8/8,CLECT:14/15,DMELA:12/12,DPOND:4/9,DPULE:19/20,HDUJA:88/107,ISCAP:23/23,NVITR:14/14,OBIMA:1/1,PCAUD:1/1,PHUMA:12/12,PXYLO:14/16,RVARI:60/63,SINVI:17/17,SMARI:39/41,TCAST:9/10,TURTI:16/16
	OG0000056	IPR	IPR002939	Chaperone DnaJ, C-terminal	410	2						0.1	HDUJA:1/107,RVARI:1/63
	OG0000056	IPR	IPR004119	Protein of unknown function DUF227	410	1						0.05	NVITR:1/14
	OG0000056	IPR	IPR013871	Cysteine-rich secretory protein	410	1						0.05	HDUJA:1/107
	OG0000056	IPR	IPR014044	CAP domain	410	1						0.05	HDUJA:1/107
	OG0000056	IPR	IPR011547	SLC26A/SulP transporter domain	410	1						0.05	RVARI:1/63
	OG0000056	IPR	IPR002645	STAS domain	410	1						0.05	RVARI:1/63
	OG0000056	IPR	IPR006787	Pinin/SDK	410	1						0.05	RVARI:1/63
	OG0000056	IPR	IPR021587	Transcription activator LAG-3	410	1						0.05	DPULE:1/20
	OG0000056	IPR	IPR001873	Na+ channel, amiloride-sensitive	410	1						0.05	SMARI:1/41
	OG0000056	IPR	IPR001623	DnaJ domain	410	1						0.05	HDUJA:1/107
	OG0000056	IPR	IPR001073	C1q domain	410	1						0.05	SMARI:1/41
	OG0000056	IPR	IPR006786	Pinin/SDK/MemA protein	410	1						0.05	RVARI:1/63
OG0000066	OG0000066	IPR	IPR004046	Glutathione S-transferase, C-terminal	378	334	2	2x1		6	5x1	1	AGAMB:1/1,AMELL:3/3,APISU:7/7,ASUUM2:12/14,BMALA:2/2,BXYLO:44/48,CELEG:42/45,CLECT:6/6,CTELE:18/19,DMELA:1/1,DPOND:5/6,DPULE:11/11,HDUJA:35/37,ISCAP:1/1,MHAPL:4/6,NVITR:8/8,OBIMA:17/27,PCAUD:4/5,PHUMA:4/4,PMURR:29/38,PPACI:41/48,PXYLO:2/2,RVARI:18/20,SINVI:7/7,SMARI:1/1,TCAST:7/7,TMURI:3/3,TSPIR:1/1
	OG0000066	IPR	IPR004045	Glutathione S-transferase, N-terminal	378	298		2x1			5x1	0.964	AGAMB:1/1,AMELL:3/3,APISU:5/7,ASUUM2:9/14,BMALA:1/2,BXYLO:37/48,CELEG:42/45,CLECT:6/6,CTELE:18/19,DMELA:1/1,DPOND:5/6,DPULE:10/11,HDUJA:33/37,MHAPL:4/6,NVITR:8/8,OBIMA:17/27,PCAUD:2/5,PHUMA:3/4,PMURR:17/38,PPACI:38/48,PXYLO:2/2,RVARI:17/20,SINVI:7/7,SMARI:1/1,TCAST:7/7,TMURI:3/3,TSPIR:1/1
	OG0000066	IPR	IPR019428	7TM GPCR, serpentine receptor class r (Str)	378	2						0.036	PPACI:2/48
	OG0000066	IPR	IPR005331	Sulfotransferase	378	1						0.036	BXYLO:1/48
	OG0000066	IPR	IPR013854	Transcription factor AP-2, C-terminal	378	1						0.036	PPACI:1/48
	OG0000066	IPR	IPR001806	Small GTPase superfamily	378	1						0.036	PPACI:1/48
	OG0000066	IPR	IPR002557	Chitin binding domain	378	1						0.036	HDUJA:1/37
OG0000080	OG0000080	IPR	IPR000863	Sulfotransferase domain	346	344	1	1x1		4	4x1	1	AGAMB:14/14,AMELL:3/3,APISU:2/2,ASUUM2:2/2,BMALA:1/1,BXYLO:2/2,CELEG:1/1,CLECT:9/9,CTELE:53/53,DMELA:3/3,DPOND:5/5,DPULE:26/26,HDUJA:23/23,ISCAP:78/78,MHAPL:1/1,NVITR:5/5,OBIMA:23/23,PCAUD:29/29,PHUMA:5/5,PMURR:5/5,PPACI:9/9,PXYLO:4/4,RVARI:15/17,SINVI:4/4,SMARI:13/13,TCAST:6/6,TSPIR:1/1,TURTI:2/2
	OG0000080	IPR	IPR001128	Cytochrome P450	346	1						0.036	HDUJA:1/23
	OG0000080	IPR	IPR000504	RNA recognition motif domain	346	1						0.036	HDUJA:1/23
	OG0000080	IPR	IPR019426	7TM GPCR, serpentine receptor class v (Srv)	346	1						0.036	PPACI:1/9
OG0000086	OG0000086	IPR	IPR001506	Peptidase M12A	329	327	4	4x1		2	2x1	1	AGAMB:11/11,AMELL:2/2,APISU:3/3,ASUUM2:6/6,BMALA:7/7,BXYLO:9/10,CELEG:9/9,CLECT:5/5,CTELE:8/8,DMELA:11/11,DPOND:2/2,DPULE:31/31,HDUJA:81/81,ISCAP:5/5,MHAPL:10/10,NVITR:6/6,OBIMA:8/8,PCAUD:10/10,PHUMA:4/4,PMURR:24/24,PPACI:16/16,PXYLO:7/7,RVARI:17/17,SINVI:8/8,SMARI:5/5,TCAST:2/2,TMURI:5/6,TSPIR:7/7,TURTI:8/8
	OG0000086	IPR	IPR003582	ShKT domain	329	44						0.448	BMALA:5/7,BXYLO:5/10,CELEG:7/9,DPULE:2/31,MHAPL:1/10,OBIMA:2/8,PCAUD:3/10,PHUMA:1/4,PMURR:5/24,PPACI:3/16,SMARI:1/5,TMURI:4/6,TSPIR:5/7
	OG0000086	IPR	IPR001223	Glycoside hydrolase family 18, catalytic domain	329	11					1x1	0.034	HDUJA:11/81
	OG0000086	IPR	IPR003609	PAN/Apple domain	329	2						0.069	HDUJA:1/81,RVARI:1/17
	OG0000086	IPR	IPR018487	Hemopexin-like repeats	329	3						0.069	HDUJA:2/81,RVARI:1/17
	OG0000086	IPR	IPR000998	MAM domain	329	2						0.069	CLECT:1/5,OBIMA:1/8
	OG0000086	IPR	IPR001480	Bulb-type lectin domain	329	2						0.034	HDUJA:2/81
	OG0000086	IPR	IPR024445	ISXO2-like transposase domain	329	1						0.034	TMURI:1/6
	OG0000086	IPR	IPR000436	Sushi/SCR/CCP domain	329	1						0.034	OBIMA:1/8
	OG0000086	IPR	IPR008160	Collagen triple helix repeat	329	1						0.034	ASUUM2:1/6
	OG0000086	IPR	IPR014023	Mononegavirales RNA-directed RNA polymerase catalytic domain	329	1						0.034	TMURI:1/6
	OG0000086	IPR	IPR009852	T-complex protein 10, C-terminal domain	329	1						0.034	DPOND:1/2
	OG0000086	IPR	IPR018392	LysM domain	329	1					1x1	0.034	RVARI:1/17
	OG0000086	IPR	IPR001304	C-type lectin-like	329	1						0.034	PMURR:1/24
	OG0000086	IPR	IPR013032	EGF-like, conserved site	329	1						0.034	PPACI:1/16
	OG0000086	IPR	IPR002492	Transposase, Tc1-like	329	1						0.034	HDUJA:1/81
	OG0000086	IPR	IPR001064	Beta/gamma crystallin	329	1						0.034	HDUJA:1/81
OG0000087	OG0000087	IPR	IPR023796	Serpin domain	329	325	2	2x1		5	5x1	1	AGAMB:14/14,AMELL:5/5,APISU:15/15,ASUUM2:11/11,BMALA:14/14,BXYLO:4/4,CELEG:6/6,CLECT:6/6,CTELE:4/4,DMELA:22/22,DPOND:7/7,DPULE:6/6,HDUJA:15/15,ISCAP:38/38,MHAPL:1/1,NVITR:9/9,OBIMA:6/6,PCAUD:2/2,PHUMA:11/11,PMURR:21/22,PPACI:9/9,PXYLO:20/22,RVARI:9/9,SINVI:5/5,SMARI:10/10,TCAST:26/26,TMURI:5/6,TSPIR:3/3,TURTI:21/21
	OG0000087	IPR	IPR000726	Glycoside hydrolase, family 19, catalytic	329	1						0.034	HDUJA:1/15
	OG0000087	IPR	IPR026066	Headcase protein	329	1						0.034	PPACI:1/9
OG0000092	OG0000092	IPR	IPR014044	CAP domain	318	295	2	2x1		1	1x1	1	AGAMB:17/17,AMELL:2/3,ASUUM2:11/14,BMALA:5/5,BXYLO:16/19,CELEG:24/24,CLECT:4/4,CTELE:13/15,DMELA:25/25,DPOND:5/5,DPULE:13/16,HDUJA:26/27,ISCAP:6/6,MHAPL:14/17,NVITR:11/11,OBIMA:10/11,PCAUD:1/1,PHUMA:1/1,PMURR:9/10,PPACI:23/25,PXYLO:12/12,RVARI:13/13,SINVI:5/7,SMARI:10/10,TCAST:9/10,TMURI:5/5,TSPIR:5/5
	OG0000092	IPR	IPR013871	Cysteine-rich secretory protein	318	37		1x1			1x1	0.407	AGAMB:1/17,AMELL:1/3,DPOND:1/5,DPULE:1/16,HDUJA:15/27,NVITR:1/11,PXYLO:2/12,RVARI:12/13,SINVI:1/7,SMARI:1/10,TCAST:1/10
	OG0000092	IPR	IPR003582	ShKT domain	318	10						0.222	ASUUM2:1/14,BMALA:1/5,CTELE:3/15,PMURR:1/10,TMURI:2/5,TSPIR:2/5
	OG0000092	IPR	IPR001506	Peptidase M12A	318	1						0.037	HDUJA:1/27
	OG0000092	IPR	IPR007274	Ctr copper transporter	318	1						0.037	PPACI:1/25
	OG0000092	IPR	IPR001534	Transthyretin-like	318	1						0.037	PPACI:1/25
	OG0000092	IPR	IPR019421	7TM GPCR, serpentine receptor class d (Srd)	318	1						0.037	PPACI:1/25
	OG0000092	IPR	IPR003173	Transcriptional coactivator p15 (PC4)	318	1						0.037	PPACI:1/25
OG0000093	OG0000093	IPR	IPR001628	Zinc finger, nuclear hormone receptor-type	317	265	1	1x1		1	1x1	1	AGAMB:9/11,AMELL:7/9,APISU:8/8,ASUUM2:12/13,BMALA:11/16,BXYLO:11/11,CELEG:13/13,CLECT:7/11,CTELE:15/15,DMELA:8/8,DPOND:7/10,DPULE:9/9,HDUJA:11/11,ISCAP:6/11,MHAPL:10/12,NVITR:4/6,OBIMA:8/16,PCAUD:8/9,PHUMA:8/9,PMURR:16/18,PPACI:8/11,PXYLO:9/14,RVARI:10/10,SINVI:8/8,SMARI:11/13,TCAST:8/8,TMURI:6/8,TSPIR:7/9,TURTI:10/10
	OG0000093	IPR	IPR000536	Nuclear hormone receptor, ligand-binding domain	317	258		1x1			1x1	1	AGAMB:11/11,AMELL:9/9,APISU:7/8,ASUUM2:8/13,BMALA:12/16,BXYLO:8/11,CELEG:10/13,CLECT:9/11,CTELE:10/15,DMELA:8/8,DPOND:8/10,DPULE:8/9,HDUJA:10/11,ISCAP:8/11,MHAPL:5/12,NVITR:6/6,OBIMA:11/16,PCAUD:8/9,PHUMA:8/9,PMURR:15/18,PPACI:6/11,PXYLO:13/14,RVARI:9/10,SINVI:7/8,SMARI:12/13,TCAST:8/8,TMURI:7/8,TSPIR:9/9,TURTI:8/10
	OG0000093	IPR	IPR000477	Reverse transcriptase domain	317	1						0.034	NVITR:1/6
	OG0000093	IPR	IPR000504	RNA recognition motif domain	317	1						0.034	TURTI:1/10
	OG0000093	IPR	IPR001932	PPM-type phosphatase domain	317	1						0.034	TMURI:1/8
OG0000100	OG0000100	IPR	IPR002172	Low-density lipoprotein (LDL) receptor class A repeat	298	284	1	1x7		1	1x4	1	AGAMB:4/4,AMELL:6/6,APISU:7/7,ASUUM2:6/7,BMALA:4/4,BXYLO:7/8,CELEG:5/5,CLECT:12/13,CTELE:49/49,DMELA:3/3,DPOND:13/13,DPULE:18/20,HDUJA:16/16,ISCAP:18/18,MHAPL:6/6,NVITR:4/4,OBIMA:22/24,PCAUD:13/13,PHUMA:4/5,PMURR:12/13,PPACI:7/8,PXYLO:7/7,RVARI:2/2,SINVI:4/5,SMARI:6/8,TCAST:3/3,TMURI:2/2,TSPIR:7/8,TURTI:17/17
	OG0000100	IPR	IPR001254	Serine proteases, trypsin domain	298	21						0.621	AGAMB:1/4,AMELL:1/6,APISU:1/7,CTELE:1/49,DPOND:1/13,DPULE:1/20,HDUJA:2/16,ISCAP:1/18,NVITR:1/4,OBIMA:2/24,PCAUD:1/13,PHUMA:1/5,PMURR:2/13,RVARI:1/2,SINVI:1/5,TCAST:1/3,TMURI:1/2,TSPIR:1/8
	OG0000100	IPR	IPR000082	SEA domain	298	11						0.31	AGAMB:1/4,AMELL:1/6,APISU:3/7,DPOND:1/13,HDUJA:1/16,PHUMA:1/5,RVARI:1/2,TCAST:1/3,TURTI:1/17
	OG0000100	IPR	IPR017448	SRCR-like domain	298	9						0.31	AMELL:1/6,APISU:1/7,HDUJA:1/16,NVITR:1/4,OBIMA:1/24,PCAUD:1/13,PHUMA:1/5,SINVI:1/5,TCAST:1/3
	OG0000100	IPR	IPR006149	EB domain	298	8						0.276	AGAMB:1/4,AMELL:1/6,APISU:1/7,DMELA:1/3,NVITR:1/4,PXYLO:1/7,SINVI:1/5,TURTI:1/17
	OG0000100	IPR	IPR020067	Frizzled domain	298	5						0.172	CLECT:1/13,DMELA:1/3,PHUMA:1/5,PXYLO:1/7,TURTI:1/17
	OG0000100	IPR	IPR026823	Complement Clr-like EGF domain	298	4						0.103	DPULE:2/20,PCAUD:1/13,TURTI:1/17
	OG0000100	IPR	IPR031866	Domain of unknown function DUF4758	298	1						0.034	TURTI:1/17
	OG0000100	IPR	IPR000998	MAM domain	298	4						0.138	HDUJA:1/16,ISCAP:1/18,OBIMA:1/24,PCAUD:1/13
	OG0000100	IPR	IPR000859	CUB domain	298	3						0.069	DPULE:2/20,TURTI:1/17
	OG0000100	IPR	IPR002557	Chitin binding domain	298	2						0.069	BXYLO:1/8,TSPIR:1/8
	OG0000100	IPR	IPR000033	LDLR class B repeat	298	1						0.034	DPOND:1/13
	OG0000100	IPR	IPR001190	SRCR domain	298	2						0.069	HDUJA:1/16,RVARI:1/2
	OG0000100	IPR	IPR001881	EGF-like calcium-binding domain	298	2						0.069	OBIMA:1/24,PXYLO:1/7
	OG0000100	IPR	IPR001506	Peptidase M12A	298	1						0.034	HDUJA:1/16
	OG0000100	IPR	IPR001304	C-type lectin-like	298	1						0.034	OBIMA:1/24
	OG0000100	IPR	IPR000436	Sushi/SCR/CCP domain	298	1						0.034	APISU:1/7
	OG0000100	IPR	IPR006970	PT repeat	298	1						0.034	PCAUD:1/13
	OG0000100	IPR	IPR015420	Peptidase S1A, nudel	298	1						0.034	DPOND:1/13
	OG0000100	IPR	IPR013098	Immunoglobulin I-set	298	1						0.034	PMURR:1/13
OG0000107	OG0000107	IPR	IPR000276	G protein-coupled receptor, rhodopsin-like	283	205	1	1x1	1	2	2x1	0.833	CTELE:6/6,HDUJA:169/232,OBIMA:1/1,PCAUD:1/2,RVARI:28/41
	OG0000107	IPR	IPR019430	7TM GPCR, serpentine receptor class x (Srx)	283	15						0.333	HDUJA:10/232,RVARI:5/41
	OG0000107	IPR	IPR019424	Serpentine type 7TM GPCR chemoreceptor Srsx	283	6						0.167	HDUJA:6/232
	OG0000107	IPR	IPR000719	Protein kinase domain	283	2						0.333	HDUJA:1/232,RVARI:1/41
	OG0000107	IPR	IPR001245	Serine-threonine/tyrosine-protein kinase catalytic domain	283	2						0.333	HDUJA:1/232,RVARI:1/41
	OG0000107	IPR	IPR019426	7TM GPCR, serpentine receptor class v (Srv)	283	2						0.167	HDUJA:2/232
	OG0000107	IPR	IPR001810	F-box domain	283	1						0.167	HDUJA:1/232
	OG0000107	IPR	IPR001828	Receptor, ligand binding region	283	1						0.167	HDUJA:1/232
	OG0000107	IPR	IPR002048	EF-hand domain	283	1						0.167	HDUJA:1/232
OG0000123	OG0000123	IPR	IPR004156	Organic anion transporter polypeptide OATP	255	252	1	1x1		1	1x1	1	AGAMB:7/7,AMELL:8/8,APISU:3/3,ASUUM2:6/6,BMALA:7/8,BXYLO:4/4,CELEG:7/7,CLECT:9/9,CTELE:12/12,DMELA:8/8,DPOND:4/4,DPULE:3/3,HDUJA:16/16,ISCAP:22/23,MHAPL:3/4,NVITR:5/5,OBIMA:18/18,PCAUD:18/18,PHUMA:5/5,PMURR:21/21,PPACI:8/8,PXYLO:7/7,RVARI:14/14,SINVI:6/6,SMARI:7/7,TCAST:3/3,TMURI:6/6,TSPIR:13/13,TURTI:2/2
	OG0000123	IPR	IPR002350	Kazal domain	255	71						0.724	AGAMB:4/7,AMELL:5/8,APISU:1/3,CLECT:3/9,CTELE:7/12,DMELA:5/8,DPOND:3/4,DPULE:1/3,HDUJA:1/16,ISCAP:4/23,NVITR:3/5,OBIMA:7/18,PCAUD:8/18,PHUMA:3/5,PXYLO:4/7,RVARI:1/14,SINVI:4/6,SMARI:2/7,TCAST:3/3,TMURI:1/6,TURTI:1/2
	OG0000123	IPR	IPR031420	UPF0669 protein C6orf120	255	2						0.034	TSPIR:2/13
	OG0000123	IPR	IPR001254	Serine proteases, trypsin domain	255	1						0.034	HDUJA:1/16
	OG0000123	IPR	IPR000859	CUB domain	255	1						0.034	HDUJA:1/16
	OG0000123	IPR	IPR011701	Major facilitator superfamily	255	1						0.034	PCAUD:1/18
	OG0000123	IPR	IPR002524	Cation efflux protein	255	1						0.034	RVARI:1/14
OG0000125	OG0000125	IPR	IPR000917	Sulfatase, N-terminal	254	234	1	1x1		1	1x1	1	AGAMB:3/3,AMELL:4/4,APISU:6/6,ASUUM2:1/1,BMALA:1/1,BXYLO:2/2,CELEG:2/2,CLECT:6/6,CTELE:50/52,DMELA:4/4,DPOND:4/4,DPULE:2/2,HDUJA:20/26,ISCAP:44/49,MHAPL:3/3,NVITR:5/5,OBIMA:4/4,PCAUD:9/9,PHUMA:5/5,PMURR:9/12,PPACI:4/5,PXYLO:6/7,RVARI:16/18,SINVI:4/4,SMARI:11/11,TCAST:6/6,TURTI:3/3
	OG0000125	IPR	IPR003150	DNA-binding RFX-type winged-helix domain	254	2						0.074	HDUJA:1/26,RVARI:1/18
	OG0000125	IPR	IPR011701	Major facilitator superfamily	254	2						0.074	HDUJA:1/26,RVARI:1/18
OG0000130	OG0000130	IPR	IPR023780	Chromo domain	247	191	1	1x1		1	1x1	1	AGAMB:3/3,AMELL:3/3,APISU:8/27,ASUUM2:9/12,BMALA:5/5,BXYLO:8/8,CELEG:4/6,CLECT:5/6,CTELE:1/2,DMELA:8/10,DPOND:5/7,DPULE:11/19,HDUJA:21/23,ISCAP:3/3,MHAPL:7/7,NVITR:3/4,OBIMA:3/5,PCAUD:3/6,PHUMA:3/3,PMURR:9/10,PPACI:9/13,PXYLO:3/3,RVARI:20/21,SINVI:3/4,SMARI:5/5,TCAST:5/5,TMURI:5/6,TSPIR:6/7,TURTI:13/14
	OG0000130	IPR	IPR008251	Chromo shadow domain	247	82						0.793	AGAMB:2/3,AMELL:1/3,APISU:23/27,ASUUM2:5/12,BMALA:3/5,CELEG:1/6,CLECT:1/6,CTELE:1/2,DMELA:6/10,DPOND:4/7,DPULE:4/19,ISCAP:1/3,NVITR:2/4,OBIMA:2/5,PCAUD:3/6,PHUMA:1/3,PMURR:1/10,PXYLO:2/3,SINVI:2/4,TCAST:3/5,TMURI:4/6,TSPIR:1/7,TURTI:9/14
	OG0000130	IPR	IPR006612	Zinc finger, C2CH-type	247	1						0.034	SINVI:1/4
	OG0000130	IPR	IPR023798	Ribosomal protein S7 domain	247	1						0.034	PPACI:1/13
	OG0000130	IPR	IPR000210	BTB/POZ domain	247	1						0.034	PPACI:1/13
	OG0000130	IPR	IPR001873	Na+ channel, amiloride-sensitive	247	1						0.034	PMURR:1/10
	OG0000130	IPR	IPR021987	SLED domain	247	1						0.034	PPACI:1/13
	OG0000130	IPR	IPR002857	Zinc finger, CXXC-type	247	1						0.034	SMARI:1/5
OG0000143	OG0000143	IPR	IPR001148	Alpha carbonic anhydrase	231	229	1	1x1		2	1x1, 1x2	1	AGAMB:10/10,AMELL:9/9,APISU:6/6,ASUUM2:7/8,BMALA:3/3,BXYLO:8/8,CELEG:4/4,CLECT:5/5,CTELE:11/11,DMELA:13/13,DPOND:4/4,DPULE:26/26,HDUJA:14/14,ISCAP:4/4,MHAPL:7/7,NVITR:7/7,OBIMA:8/8,PCAUD:4/4,PHUMA:4/4,PMURR:17/17,PPACI:5/5,PXYLO:13/13,RVARI:9/10,SINVI:7/7,SMARI:9/9,TCAST:4/4,TMURI:3/3,TSPIR:3/3,TURTI:5/5
	OG0000143	IPR	IPR001506	Peptidase M12A	231	1		1x1				0.034	HDUJA:1/14
	OG0000143	IPR	IPR000276	G protein-coupled receptor, rhodopsin-like	231	1						0.034	PMURR:1/17
	OG0000143	IPR	IPR001853	DSBA-like thioredoxin domain	231	1						0.034	CTELE:1/11
OG0000244	OG0000244	IPR	IPR001609	Myosin head, motor domain	154	131	1	1x1		1	1x1	1	AGAMB:2/2,AMELL:3/3,APISU:2/2,ASUUM2:12/18,BMALA:6/8,BXYLO:10/10,CELEG:9/9,CLECT:2/2,CTELE:2/2,DMELA:2/2,DPOND:3/3,DPULE:2/2,HDUJA:4/7,ISCAP:1/1,MHAPL:7/9,NVITR:1/1,OBIMA:5/6,PCAUD:14/14,PHUMA:2/2,PMURR:13/19,PPACI:9/11,PXYLO:2/3,RVARI:3/3,SINVI:2/2,SMARI:2/2,TCAST:2/2,TMURI:3/3,TSPIR:3/3,TURTI:3/3
	OG0000244	IPR	IPR002928	Myosin tail	154	108		1x1			1x1	0.966	AGAMB:2/2,AMELL:2/3,APISU:2/2,ASUUM2:12/18,BMALA:8/8,BXYLO:7/10,CELEG:7/9,CLECT:2/2,DMELA:2/2,DPOND:2/3,DPULE:2/2,HDUJA:7/7,ISCAP:1/1,MHAPL:3/9,NVITR:1/1,OBIMA:3/6,PCAUD:10/14,PHUMA:2/2,PMURR:7/19,PPACI:7/11,PXYLO:2/3,RVARI:3/3,SINVI:2/2,SMARI:2/2,TCAST:2/2,TMURI:3/3,TSPIR:3/3,TURTI:2/3
	OG0000244	IPR	IPR004009	Myosin, N-terminal, SH3-like	154	88		1x1			1x1	1	AGAMB:2/2,AMELL:2/3,APISU:2/2,ASUUM2:7/18,BMALA:6/8,BXYLO:7/10,CELEG:7/9,CLECT:1/2,CTELE:1/2,DMELA:2/2,DPOND:1/3,DPULE:2/2,HDUJA:4/7,ISCAP:1/1,MHAPL:5/9,NVITR:1/1,OBIMA:1/6,PCAUD:9/14,PHUMA:2/2,PMURR:3/19,PPACI:3/11,PXYLO:2/3,RVARI:3/3,SINVI:2/2,SMARI:2/2,TCAST:2/2,TMURI:3/3,TSPIR:3/3,TURTI:2/3
	OG0000244	IPR	IPR000048	IQ motif, EF-hand binding site	154	13						0.448	AGAMB:1/2,AMELL:1/3,APISU:1/2,CLECT:1/2,DMELA:1/2,DPOND:1/3,HDUJA:1/7,OBIMA:1/6,PHUMA:1/2,RVARI:1/3,SINVI:1/2,SMARI:1/2,TCAST:1/2
OG0000268	OG0000268	IPR	IPR002347	Short-chain dehydrogenase/reductase SDR	147	145	1	1x1		1	1x1	1	AGAMB:8/8,AMELL:7/7,APISU:13/13,CLECT:7/7,CTELE:6/6,DMELA:9/9,DPOND:12/12,DPULE:1/1,HDUJA:26/28,MHAPL:1/1,NVITR:20/20,OBIMA:4/4,PHUMA:1/1,PXYLO:3/3,RVARI:8/8,SINVI:3/3,TCAST:16/16
	OG0000268	IPR	IPR000668	Peptidase C1A, papain C-terminal	147	1						0.059	HDUJA:1/28
	OG0000268	IPR	IPR000743	Glycoside hydrolase, family 28	147	1						0.059	DPOND:1/12
	OG0000268	IPR	IPR007588	Zinc finger, FLYWCH-type	147	1						0.059	MHAPL:1/1
	OG0000268	IPR	IPR010562	Haemolymph juvenile hormone binding	147	1						0.059	TCAST:1/16
OG0000312	OG0000312	IPR	IPR001715	Calponin homology domain	133	121	2	2x1		3	3x1	1	AGAMB:4/4,AMELL:5/6,APISU:4/4,ASUUM2:4/6,BMALA:5/5,BXYLO:3/4,CELEG:4/4,CLECT:4/4,CTELE:6/6,DMELA:3/3,DPOND:9/9,DPULE:4/4,HDUJA:6/7,ISCAP:4/5,MHAPL:4/4,NVITR:5/5,OBIMA:2/4,PCAUD:3/3,PHUMA:4/4,PMURR:4/4,PPACI:2/4,PXYLO:4/5,RVARI:6/6,SINVI:4/4,SMARI:3/3,TCAST:4/4,TMURI:3/3,TSPIR:3/3,TURTI:5/6
	OG0000312	IPR	IPR000557	Calponin repeat	133	93						0.966	AGAMB:4/4,AMELL:5/6,APISU:4/4,ASUUM2:2/6,BMALA:2/5,BXYLO:1/4,CELEG:2/4,CLECT:4/4,CTELE:5/6,DMELA:3/3,DPOND:8/9,DPULE:4/4,HDUJA:2/7,ISCAP:4/5,NVITR:5/5,OBIMA:4/4,PCAUD:3/3,PHUMA:4/4,PMURR:1/4,PPACI:1/4,PXYLO:5/5,RVARI:2/6,SINVI:4/4,SMARI:3/3,TCAST:4/4,TMURI:2/3,TSPIR:1/3,TURTI:4/6
OG0000318	OG0000318	IPR	IPR000322	Glycoside hydrolase family 31	131	121	1	1x3		1	1x4	1	AMELL:1/2,APISU:2/3,ASUUM2:25/27,BMALA:1/1,BXYLO:3/3,CELEG:2/2,CLECT:1/1,CTELE:10/11,DPOND:1/1,DPULE:5/6,HDUJA:6/6,ISCAP:9/10,MHAPL:1/1,NVITR:4/4,OBIMA:4/4,PCAUD:7/9,PHUMA:2/2,PMURR:13/14,PPACI:3/3,PXYLO:1/1,RVARI:5/5,SINVI:1/1,SMARI:4/4,TCAST:1/1,TMURI:3/3,TSPIR:3/3,TURTI:3/3
	OG0000318	IPR	IPR031727	Galactose mutarotase, N-terminal barrel	131	79		1x2			1x3	1	AMELL:2/2,APISU:2/3,ASUUM2:12/27,BMALA:1/1,BXYLO:3/3,CELEG:2/2,CLECT:1/1,CTELE:8/11,DPOND:1/1,DPULE:4/6,HDUJA:6/6,ISCAP:4/10,MHAPL:1/1,NVITR:1/4,OBIMA:1/4,PCAUD:3/9,PHUMA:2/2,PMURR:5/14,PPACI:2/3,PXYLO:1/1,RVARI:5/5,SINVI:1/1,SMARI:4/4,TCAST:1/1,TMURI:1/3,TSPIR:2/3,TURTI:3/3
	OG0000318	IPR	IPR000519	P-type trefoil domain	131	68						1	AMELL:2/2,APISU:3/3,ASUUM2:12/27,BMALA:1/1,BXYLO:1/3,CELEG:2/2,CLECT:1/1,CTELE:4/11,DPOND:1/1,DPULE:3/6,HDUJA:4/6,ISCAP:2/10,MHAPL:1/1,NVITR:1/4,OBIMA:1/4,PCAUD:4/9,PHUMA:2/2,PMURR:5/14,PPACI:2/3,PXYLO:1/1,RVARI:4/5,SINVI:1/1,SMARI:4/4,TCAST:1/1,TMURI:1/3,TSPIR:1/3,TURTI:3/3
	OG0000318	IPR	IPR025887	Glycoside hydrolase family 31, N-terminal domain	131	48		1x1			1x2	0.852	AMELL:1/2,APISU:2/3,ASUUM2:5/27,BMALA:1/1,BXYLO:3/3,CELEG:1/2,CTELE:1/11,DPOND:1/1,DPULE:3/6,HDUJA:5/6,ISCAP:2/10,OBIMA:1/4,PCAUD:1/9,PHUMA:2/2,PMURR:3/14,PPACI:2/3,PXYLO:1/1,RVARI:4/5,SINVI:1/1,SMARI:2/4,TCAST:1/1,TSPIR:2/3,TURTI:3/3
	OG0000318	IPR	IPR033403	Domain of unknown function DUF5110	131	2						0.074	PCAUD:1/9,SMARI:1/4
	OG0000318	IPR	IPR001680	WD40 repeat	131	1						0.037	TMURI:1/3
OG0000370	OG0000370	IPR	IPR011701	Major facilitator superfamily	115	97	1	1x1		2	2x1	1	AGAMB:1/1,AMELL:2/2,APISU:4/4,ASUUM2:1/1,BMALA:2/2,BXYLO:1/5,CELEG:1/1,CLECT:3/3,CTELE:2/2,DPOND:3/3,DPULE:4/4,HDUJA:8/8,ISCAP:5/8,MHAPL:3/3,OBIMA:2/4,PCAUD:4/7,PHUMA:3/3,PMURR:4/5,PPACI:1/1,PXYLO:3/3,RVARI:7/7,SINVI:1/1,SMARI:13/14,TCAST:2/2,TMURI:2/2,TSPIR:2/3,TURTI:13/16
	OG0000370	IPR	IPR003844	Uncharacterised protein family UPF0060	115	1						0.037	SMARI:1/14
	OG0000370	IPR	IPR019421	7TM GPCR, serpentine receptor class d (Srd)	115	1						0.037	BXYLO:1/5
	OG0000370	IPR	IPR005312	Protein of unknown function DUF1759	115	1						0.037	APISU:1/4
	OG0000370	IPR	IPR010562	Haemolymph juvenile hormone binding	115	1						0.037	AMELL:1/2
	OG0000370	IPR	IPR024989	Major facilitator superfamily associated domain	115	1						0.037	PHUMA:1/3
OG0000390	OG0000390	IPR	IPR001424	Superoxide dismutase, copper/zinc binding domain	110	109	2	2x1		2	2x1	1	AGAMB:2/2,AMELL:1/1,APISU:2/2,ASUUM2:2/2,BMALA:2/2,BXYLO:2/2,CELEG:3/3,CLECT:3/3,CTELE:4/4,DMELA:2/2,DPOND:4/4,DPULE:8/8,HDUJA:9/9,ISCAP:7/7,MHAPL:1/1,NVITR:3/3,OBIMA:1/1,PCAUD:2/2,PHUMA:3/3,PMURR:8/8,PPACI:3/3,PXYLO:7/7,RVARI:12/13,SINVI:3/3,SMARI:4/4,TCAST:3/3,TMURI:2/2,TSPIR:1/1,TURTI:5/5
OG0000471	OG0000471	IPR	IPR024041	Ammonium transporter AmtB-like domain	100	100	1	1x1	1	1	1x1	1	AGAMB:1/1,AMELL:3/3,APISU:1/1,ASUUM2:3/3,BMALA:2/2,CELEG:4/4,CLECT:4/4,CTELE:9/9,DMELA:1/1,DPOND:1/1,DPULE:5/5,HDUJA:9/9,ISCAP:7/7,MHAPL:6/6,NVITR:2/2,OBIMA:1/1,PCAUD:8/8,PHUMA:3/3,PMURR:12/12,PPACI:2/2,PXYLO:5/5,RVARI:6/6,SINVI:2/2,SMARI:2/2,TCAST:1/1
	OG0000471	IPR	IPR001254	Serine proteases, trypsin domain	100	1						0.04	ISCAP:1/7
	OG0000471	IPR	IPR004241	Autophagy protein Atg8 ubiquitin-like	100	1						0.04	NVITR:1/2
OG0000473	OG0000473	IPR	IPR000566	Lipocalin/cytosolic fatty-acid binding domain	99	93	1	2x1		2	2x1	1	AGAMB:9/9,AMELL:2/2,APISU:3/3,CLECT:3/3,CTELE:1/1,DMELA:2/3,DPOND:4/4,DPULE:12/14,HDUJA:7/7,ISCAP:1/2,NVITR:1/1,PHUMA:2/2,PXYLO:9/10,RVARI:5/5,SINVI:2/2,SMARI:1/1,TCAST:1/2,TURTI:28/28
	OG0000473	IPR	IPR000477	Reverse transcriptase domain	99	1						0.056	RVARI:1/5
	OG0000473	IPR	IPR003306	WIF domain	99	1						0.056	DPOND:1/4
OG0000485	OG0000485	IPR	IPR000782	FAS1 domain	98	95	1	1x1		1	1x2	1	AGAMB:3/3,AMELL:2/3,APISU:3/3,ASUUM2:1/2,BMALA:1/1,CLECT:3/3,CTELE:1/1,DMELA:2/2,DPOND:2/2,DPULE:28/28,HDUJA:4/4,ISCAP:7/7,NVITR:1/1,OBIMA:9/10,PCAUD:5/5,PHUMA:1/1,PMURR:2/2,PPACI:1/1,PXYLO:2/2,RVARI:4/4,SINVI:1/1,SMARI:5/5,TCAST:2/2,TMURI:1/1,TSPIR:1/1,TURTI:3/3
	OG0000485	IPR	IPR024731	EGF domain	98	1						0.038	OBIMA:1/10
	OG0000485	IPR	IPR000477	Reverse transcriptase domain	98	1						0.038	PXYLO:1/2
	OG0000485	IPR	IPR005135	Endonuclease/exonuclease/phosphatase	98	1						0.038	PXYLO:1/2
OG0000504	OG0000504	IPR	IPR000276	G protein-coupled receptor, rhodopsin-like	96	33	2	1x1,1x0		1	0	0.75	CTELE:2/3,HDUJA:24/75,RVARI:7/17
	OG0000504	IPR	IPR019427	7TM GPCR, serpentine receptor class w (Srw)	96	9						0.75	HDUJA:6/75,PCAUD:1/1,RVARI:2/17
	OG0000504	IPR	IPR001258	NHL repeat	96	1						0.25	HDUJA:1/75
	OG0000504	IPR	IPR006689	Small GTPase superfamily, ARF/SAR type	96	1						0.25	RVARI:1/17
	OG0000504	IPR	IPR000620	EamA domain	96	1						0.25	HDUJA:1/75
OG0000600	OG0000600	IPR	IPR003929	Potassium channel, calcium-activated, BK, alpha subunit	86	56	2	1x1,1x0		1	1x1	0.964	AGAMB:1/1,AMELL:1/2,APISU:1/1,ASUUM2:1/1,BMALA:1/1,BXYLO:1/1,CELEG:1/1,CLECT:1/4,CTELE:3/4,DMELA:1/1,DPOND:3/11,DPULE:1/1,HDUJA:13/15,ISCAP:1/2,MHAPL:1/2,OBIMA:1/4,PHUMA:1/1,PMURR:1/2,PPACI:1/2,PXYLO:1/2,RVARI:12/13,SINVI:1/2,SMARI:1/2,TCAST:1/1,TMURI:2/2,TSPIR:2/5,TURTI:1/1
	OG0000600	IPR	IPR005821	Ion transport domain	86	26						0.786	AGAMB:1/1,AMELL:1/2,APISU:1/1,ASUUM2:1/1,BMALA:1/1,BXYLO:1/1,CELEG:1/1,CLECT:1/4,CTELE:3/4,DMELA:1/1,DPULE:1/1,HDUJA:1/15,MHAPL:1/2,OBIMA:1/4,PHUMA:1/1,PMURR:1/2,PXYLO:1/2,SINVI:1/2,TCAST:1/1,TMURI:2/2,TSPIR:2/5,TURTI:1/1
	OG0000600	IPR	IPR013099	Potassium channel domain	86	20		1x1,1x0				0.214	CTELE:1/4,DPOND:2/11,HDUJA:8/15,PPACI:1/2,RVARI:7/13,SMARI:1/2
	OG0000600	IPR	IPR001320	Ionotropic glutamate receptor	86	1						0.036	RVARI:1/13
	OG0000600	IPR	IPR008468	DNA methyltransferase 1-associated 1	86	1						0.036	TMURI:1/2
	OG0000600	IPR	IPR003148	Regulator of K+ conductance, N-terminal	86	1						0.036	HDUJA:1/15
	OG0000600	IPR	IPR002994	Surfeit locus 1/Shy1	86	1						0.036	HDUJA:1/15
	OG0000600	IPR	IPR032563	DAMP1, SANT/Myb-like domain	86	1						0.036	TMURI:1/2
OG0000650	OG0000650	IPR	IPR002213	UDP-glucuronosyl/UDP-glucosyltransferase	82	69	2	2x1	2	2	2x1	1	HDUJA:39/48,MHAPL:1/1,PPACI:1/1,RVARI:28/32
	OG0000650	IPR	IPR000863	Sulfotransferase domain	82	1						0.25	RVARI:1/32
	OG0000650	IPR	IPR010291	Ion channel regulatory protein, UNC-93	81	74	1	1x1		1	1x1	1	AGAMB:1/1,AMELL:1/1,APISU:5/6,ASUUM2:2/3,BMALA:1/1,BXYLO:1/2,CELEG:8/8,CLECT:2/2,CTELE:1/1,DMELA:1/1,DPOND:1/1,DPULE:1/1,HDUJA:10/11,ISCAP:1/1,MHAPL:2/2,NVITR:1/1,OBIMA:2/2,PCAUD:1/1,PHUMA:1/1,PMURR:6/8,PPACI:3/3,PXYLO:1/1,RVARI:8/8,SINVI:1/1,SMARI:1/1,TCAST:1/1,TMURI:1/1,TSPIR:1/2,TURTI:8/8
	OG0000650	IPR	IPR005683	Mitochondrial import receptor subunit Tom22	81	1						0.034	TSPIR:1/2
	OG0000650	IPR	IPR011701	Major facilitator superfamily	81	1						0.034	BXYLO:1/2
	OG0000650	IPR	IPR002717	Histone acetyltransferase domain, MYST-type	81	1						0.034	PPACI:1/3
OG0000671	OG0000671	IPR	IPR004045	Glutathione S-transferase, N-terminal	80	72	1	1x1		1	1x1	0.962	AGAMB:1/1,AMELL:3/3,APISU:2/3,ASUUM2:3/3,BMALA:2/2,CELEG:5/5,CLECT:1/1,CTELE:4/4,DMELA:4/4,DPOND:1/1,DPULE:1/1,HDUJA:7/8,ISCAP:4/4,NVITR:2/2,OBIMA:3/5,PCAUD:1/1,PHUMA:1/1,PMURR:4/5,PPACI:3/4,PXYLO:7/8,RVARI:5/5,SINVI:2/2,SMARI:1/1,TCAST:3/3,TURTI:2/2
	OG0000671	IPR	IPR004046	Glutathione S-transferase, C-terminal	80	18					1x1	0.423	ASUUM2:1/3,BMALA:1/2,CELEG:5/5,CTELE:2/4,ISCAP:1/4,NVITR:1/2,OBIMA:2/5,PMURR:2/5,PPACI:1/4,RVARI:1/5,TURTI:1/2
	OG0000671	IPR	IPR008197	WAP-type 'four-disulfide core' domain	80	1						0.038	TMURI:1/1
	OG0000671	IPR	IPR007529	Zinc finger, HIT-type	80	1						0.038	HDUJA:1/8
OG0000684	OG0000684	IPR	IPR028073	PTHB1, N-terminal domain	79	32	7	0	5	1	0	1	AGAMB:1/1,AMELL:1/1,APISU:1/1,ASUUM2:2/3,BMALA:1/1,BXYLO:1/2,CELEG:1/1,CLECT:1/1,CTELE:1/2,DMELA:1/1,DPOND:2/3,DPULE:1/2,HDUJA:1/33,ISCAP:1/1,MHAPL:1/2,NVITR:1/1,OBIMA:1/1,PCAUD:1/1,PHUMA:1/1,PMURR:1/1,PXYLO:3/4,RVARI:1/8,SINVI:1/1,SMARI:1/2,TCAST:1/1,TMURI:1/1,TSPIR:1/1,TURTI:1/1
	OG0000684	IPR	IPR028074	PTHB1, C-terminal domain	79	28						0.964	AGAMB:1/1,AMELL:1/1,APISU:1/1,ASUUM2:1/3,BXYLO:1/2,CELEG:1/1,CLECT:1/1,CTELE:2/2,DMELA:1/1,DPOND:1/3,DPULE:1/2,HDUJA:1/33,ISCAP:1/1,MHAPL:1/2,NVITR:1/1,OBIMA:1/1,PCAUD:1/1,PHUMA:1/1,PMURR:1/1,PXYLO:1/4,RVARI:1/8,SINVI:1/1,SMARI:1/2,TCAST:1/1,TMURI:1/1,TSPIR:1/1,TURTI:1/1
	OG0000684	IPR	IPR020683	Ankyrin repeat-containing domain	79	1						0.036	HDUJA:1/33
	OG0000684	IPR	IPR000408	Regulator of chromosome condensation, RCC1	79	1						0.036	HDUJA:1/33
OG0000701	OG0000701	IPR	IPR002223	Pancreatic trypsin inhibitor Kunitz domain	78	45	2	1x7		1	1x7	0.966	AGAMB:1/2,AMELL:1/3,APISU:1/2,ASUUM2:1/1,BMALA:1/4,BXYLO:1/1,CELEG:1/1,CLECT:2/2,CTELE:1/4,DMELA:1/2,DPOND:1/3,DPULE:2/3,HDUJA:2/3,ISCAP:1/1,MHAPL:1/1,NVITR:1/1,OBIMA:2/8,PCAUD:1/3,PHUMA:1/1,PMURR:3/4,PPACI:1/1,PXYLO:2/4,RVARI:2/3,SINVI:1/4,SMARI:2/3,TCAST:1/2,TMURI:6/6,TSPIR:4/4
	OG0000701	IPR	IPR000884	Thrombospondin type-1 (TSP1) repeat	78	52		2x6			1x6	0.966	AGAMB:2/2,AMELL:3/3,APISU:2/2,ASUUM2:1/1,BMALA:4/4,BXYLO:1/1,CELEG:1/1,CLECT:1/2,CTELE:3/4,DMELA:2/2,DPOND:1/3,DPULE:2/3,HDUJA:2/3,MHAPL:1/1,NVITR:1/1,OBIMA:6/8,PCAUD:2/3,PHUMA:1/1,PMURR:1/4,PPACI:1/1,PXYLO:2/4,RVARI:2/3,SINVI:3/4,SMARI:2/3,TCAST:2/2,TMURI:1/6,TSPIR:1/4,TURTI:1/1
	OG0000701	IPR	IPR010294	ADAM-TS Spacer 1	78	46		2x1			1x1	0.931	AGAMB:2/2,AMELL:3/3,APISU:2/2,ASUUM2:1/1,BMALA:1/4,BXYLO:1/1,CELEG:1/1,CLECT:1/2,CTELE:4/4,DMELA:2/2,DPOND:2/3,DPULE:2/3,HDUJA:2/3,MHAPL:1/1,OBIMA:4/8,PCAUD:1/3,PHUMA:1/1,PMURR:1/4,PPACI:1/1,PXYLO:2/4,RVARI:2/3,SINVI:3/4,SMARI:1/3,TCAST:2/2,TMURI:1/6,TSPIR:1/4,TURTI:1/1
	OG0000701	IPR	IPR010909	PLAC	78	36		1x1			1x1	0.655	AGAMB:2/2,AMELL:2/3,APISU:2/2,CELEG:1/1,CLECT:1/2,CTELE:2/4,DMELA:2/2,DPOND:1/3,DPULE:2/3,HDUJA:1/3,OBIMA:3/8,PCAUD:3/3,PHUMA:1/1,PMURR:1/4,PXYLO:4/4,RVARI:2/3,SINVI:2/4,SMARI:2/3,TCAST:2/2
	OG0000701	IPR	IPR013098	Immunoglobulin I-set	78	18		1x3			1x2	0.586	AGAMB:1/2,AMELL:1/3,APISU:1/2,CLECT:1/2,CTELE:1/4,DMELA:1/2,DPULE:1/3,HDUJA:1/3,PCAUD:1/3,PHUMA:1/1,PMURR:1/4,PXYLO:2/4,RVARI:1/3,SINVI:1/4,SMARI:1/3,TCAST:1/2,TMURI:1/6
	OG0000701	IPR	IPR008197	WAP-type 'four-disulfide core' domain	78	8		1x1			1x1	0.276	AMELL:1/3,CLECT:1/2,CTELE:1/4,DPULE:1/3,HDUJA:1/3,NVITR:1/1,RVARI:1/3,SINVI:1/4
	OG0000701	IPR	IPR028150	Lustrin, cysteine-rich repeated domain	78	3						0.069	TMURI:1/6,TSPIR:2/4
	OG0000701	IPR	IPR007110	Immunoglobulin-like domain	78	2						0.069	CLECT:1/2,DPULE:1/3
	OG0000701	IPR	IPR004094	Antistasin-like domain	78	2		1x1			1x1	0.069	HDUJA:1/3,RVARI:1/3
	OG0000701	IPR	IPR000716	Thyroglobulin type-1	78	2						0.069	TMURI:1/6,TSPIR:1/4
OG0000848	OG0000848	IPR	IPR008253	Marvel domain	69	35	1	1x1		1	0	0.724	AGAMB:2/2,AMELL:1/2,APISU:1/2,ASUUM2:1/1,BXYLO:1/1,CELEG:1/2,DMELA:1/2,DPOND:1/1,DPULE:3/3,HDUJA:4/8,MHAPL:1/1,NVITR:2/2,PCAUD:3/5,PHUMA:2/2,PMURR:2/3,PPACI:1/1,RVARI:2/4,SINVI:1/1,SMARI:3/4,TCAST:1/2,TMURI:1/1
OG0000852	OG0000852	IPR	IPR000940	Methyltransferase, NNMT/PNMT/TEMT	69	67	1	1x1		1	1x1	1	ASUUM2:1/1,BMALA:3/3,BXYLO:3/3,CELEG:3/3,CTELE:5/5,DPULE:2/2,HDUJA:6/6,ISCAP:15/16,MHAPL:2/2,PMURR:10/10,PPACI:4/4,RVARI:3/3,SMARI:8/8,TMURI:1/2,TSPIR:1/1
	OG0000852	IPR	IPR000884	Thrombospondin type-1 (TSP1) repeat	69	1						0.067	HDUJA:1/6
OG0000857	OG0000857	IPR	IPR004313	Acireductone dioxygenase ARD family	68	67	1	1x1		1	1x1	1	AGAMB:1/1,AMELL:1/1,APISU:1/1,ASUUM2:3/3,BMALA:1/1,BXYLO:4/4,CELEG:3/3,CLECT:1/1,CTELE:4/4,DMELA:1/1,DPOND:2/2,DPULE:1/1,HDUJA:2/2,ISCAP:9/9,MHAPL:4/4,NVITR:1/1,OBIMA:1/1,PCAUD:4/5,PHUMA:1/1,PMURR:5/5,PPACI:5/5,PXYLO:4/4,RVARI:2/2,SINVI:1/1,SMARI:1/1,TCAST:2/2,TURTI:2/2
	OG0000857	IPR	IPR001952	Alkaline phosphatase	68	2						0.074	CLECT:1/1,PCAUD:1/5
	OG0000857	IPR	IPR006578	MADF domain	68	1						0.037	PPACI:1/5
OG0000868	OG0000868	IPR	IPR002068	Alpha crystallin/Hsp20 domain	68	62	3	3x1		1	1x1	1	AGAMB:1/1,AMELL:1/2,APISU:1/1,ASUUM2:2/2,BMALA:2/2,BXYLO:2/2,CELEG:1/1,CLECT:1/2,CTELE:5/5,DMELA:1/1,DPOND:1/2,DPULE:2/2,HDUJA:9/9,ISCAP:2/2,NVITR:1/1,OBIMA:5/5,PCAUD:3/3,PHUMA:2/4,PMURR:2/2,PPACI:3/3,PXYLO:2/2,RVARI:6/6,SINVI:1/2,SMARI:2/2,TCAST:1/1,TMURI:1/1,TSPIR:1/1,TURTI:1/1
OG0000872	OG0000872	IPR	IPR000683	Oxidoreductase, N-terminal	68	58	1	1x1		1	1x1	1	AGAMB:2/2,AMELL:1/1,APISU:2/2,ASUUM2:1/1,BXYLO:7/8,CTELE:3/3,DMELA:3/3,DPOND:5/6,HDUJA:7/8,ISCAP:1/2,MHAPL:1/1,NVITR:1/1,OBIMA:3/5,PCAUD:2/2,PMURR:3/5,PXYLO:2/2,RVARI:8/8,SINVI:1/1,SMARI:1/1,TCAST:2/4,TURTI:2/2
	OG0000872	IPR	IPR004104	Oxidoreductase, C-terminal	68	7						0.238	AGAMB:1/2,APISU:1/2,DMELA:1/3,OBIMA:2/5,PCAUD:2/2
OG0000910	OG0000910	IPR	IPR004046	Glutathione S-transferase, C-terminal	66	58	1	1x1		1	1x1	1	CTELE:2/2,DPULE:6/7,HDUJA:7/8,ISCAP:18/21,OBIMA:1/1,PCAUD:3/3,PMURR:3/4,PPACI:1/1,RVARI:4/6,SMARI:1/1,TURTI:12/12
	OG0000910	IPR	IPR004045	Glutathione S-transferase, N-terminal	66	52		1x1				1	CTELE:2/2,DPULE:6/7,HDUJA:5/8,ISCAP:16/21,OBIMA:1/1,PCAUD:2/3,PMURR:2/4,PPACI:1/1,RVARI:4/6,SMARI:1/1,TURTI:12/12
OG0001074	OG0001074	IPR	IPR002928	Myosin tail	59	39	1	1x1		1	1x1	1	AGAMB:1/1,AMELL:2/2,APISU:1/1,ASUUM2:4/4,BMALA:3/5,BXYLO:1/1,CELEG:1/1,CLECT:1/1,DMELA:1/1,DPOND:1/1,DPULE:1/17,HDUJA:1/1,ISCAP:1/1,MHAPL:1/2,NVITR:1/1,OBIMA:1/1,PCAUD:3/3,PHUMA:1/1,PMURR:3/3,PPACI:1/1,PXYLO:1/1,RVARI:1/1,SINVI:1/1,SMARI:1/2,TCAST:2/2,TMURI:1/1,TSPIR:1/1,TURTI:1/1
	OG0001074	IPR	IPR001881	EGF-like calcium-binding domain	59	1						0.036	DPULE:1/17
	OG0001074	IPR	IPR011701	Major facilitator superfamily	59	1					1x1	0.036	RVARI:1/1
OG0001236	OG0001236	IPR	IPR024989	Major facilitator superfamily associated domain	54	54	1	1x1		1	1x1	1	AGAMB:3/3,AMELL:1/1,APISU:1/1,CLECT:2/2,DMELA:1/1,DPOND:2/2,DPULE:9/9,HDUJA:14/14,ISCAP:2/2,NVITR:1/1,PHUMA:2/2,PXYLO:2/2,RVARI:7/7,SINVI:1/1,SMARI:3/3,TCAST:2/2,TURTI:1/1
OG0001791	OG0001791	IPR	IPR001506	Peptidase M12A	43	36	3	3x1		3	3x1	0.571	AGAMB:1/2,HDUJA:14/15,OBIMA:1/1,RVARI:20/21
	OG0001791	IPR	IPR003582	ShKT domain	43	1						0.143	OBIMA:1/1
	OG0001791	IPR	IPR009283	Apyrase	43	1						0.143	HDUJA:1/15
OG0002044	OG0002044	IPR	IPR002048	EF-hand domain	40	19	1	1x1		1	1x2	0.625	AGAMB:1/1,AMELL:1/1,APISU:1/1,CTELE:1/2,DMELA:1/1,DPULE:1/1,HDUJA:2/2,NVITR:1/1,OBIMA:2/3,PCAUD:1/1,PMURR:1/7,PXYLO:2/2,RVARI:2/2,SINVI:1/2,TCAST:1/1
OG0002103	OG0002103	IPR	IPR020602	GTP cyclohydrolase I domain	39	39	1	1x1		1	1x1	1	AGAMB:1/1,AMELL:1/1,APISU:1/1,ASUUM2:2/2,BMALA:1/1,BXYLO:1/1,CELEG:1/1,CLECT:1/1,CTELE:1/1,DMELA:1/1,DPOND:2/2,DPULE:1/1,HDUJA:3/3,ISCAP:1/1,MHAPL:1/1,NVITR:1/1,OBIMA:1/1,PCAUD:1/1,PHUMA:1/1,PMURR:4/4,PPACI:1/1,PXYLO:2/2,RVARI:3/3,SINVI:1/1,SMARI:1/1,TCAST:1/1,TMURI:1/1,TSPIR:1/1,TURTI:1/1
OG0002165	OG0002165	IPR	IPR002048	EF-hand domain	39	34	1	1x3		3	2x3,1x2	0.947	AGAMB:1/1,APISU:1/2,CLECT:1/1,CTELE:2/2,DMELA:1/1,DPOND:1/1,DPULE:1/1,HDUJA:6/7,MHAPL:1/1,OBIMA:1/1,PCAUD:4/4,PHUMA:1/2,PMURR:1/1,PXYLO:1/1,RVARI:6/6,SMARI:1/1,TCAST:1/1,TURTI:3/3
OG0002445	OG0002445	IPR	IPR013694	VIT domain	37	23	6	5x1	1	1	1x1	0.857	CTELE:4/6,DPULE:3/4,HDUJA:10/18,OBIMA:3/4,RVARI:2/3,SMARI:1/1
	OG0002445	IPR	IPR002035	von Willebrand factor, type A	37	19		1x2, 3x1			1x1	0.857	CTELE:3/6,DPULE:3/4,HDUJA:9/18,OBIMA:1/4,RVARI:2/3,SMARI:1/1
	OG0002445	IPR	IPR012317	Poly(ADP-ribose) polymerase, catalytic domain	37	2						0.286	CTELE:1/6,SMARI:1/1
	OG0002445	IPR	IPR001357	BRCT domain	37	2						0.286	CTELE:1/6,SMARI:1/1
	OG0002445	IPR	IPR004000	Actin family	37	1						0.143	CTELE:1/6
	OG0002445	IPR	IPR004102	Poly(ADP-ribose) polymerase, regulatory domain	37	1						0.143	CTELE:1/6
OG0002660	OG0002660	IPR	IPR011234	Fumarylacetoacetase, C-terminal-related	35	35	1	1x1		1	1x1	1	AGAMB:1/1,AMELL:1/1,APISU:1/1,ASUUM2:1/1,BXYLO:2/2,CELEG:1/1,CLECT:1/1,CTELE:1/1,DMELA:1/1,DPOND:1/1,DPULE:2/2,HDUJA:3/3,ISCAP:1/1,MHAPL:1/1,NVITR:1/1,OBIMA:1/1,PCAUD:1/1,PHUMA:1/1,PPACI:1/1,PXYLO:2/2,RVARI:3/3,SINVI:1/1,SMARI:2/2,TCAST:1/1,TMURI:1/1,TURTI:2/2
	OG0002660	IPR	IPR015377	Fumarylacetoacetase, N-terminal	35	34		1x1			1x1	0.962	AGAMB:1/1,AMELL:1/1,APISU:1/1,ASUUM2:1/1,BXYLO:2/2,CELEG:1/1,CLECT:1/1,CTELE:1/1,DMELA:1/1,DPOND:1/1,DPULE:2/2,HDUJA:3/3,ISCAP:1/1,MHAPL:1/1,NVITR:1/1,OBIMA:1/1,PHUMA:1/1,PPACI:1/1,PXYLO:2/2,RVARI:3/3,SINVI:1/1,SMARI:2/2,TCAST:1/1,TMURI:1/1,TURTI:2/2
	OG0002660	IPR	IPR016009	tRNA methyltransferase TRMD/TRM10-type domain	35	1						0.038	PPACI:1/1
	OG0002660	IPR	IPR002885	Pentatricopeptide repeat	35	1						0.038	TMURI:1/1
	OG0002660	IPR	IPR002738	RNase P subunit p30	35	1						0.038	PPACI:1/1
	OG0002660	IPR	IPR033443	Pentacotripeptide-repeat region of PROPR	35	1						0.038	TMURI:1/1
OG0004378	OG0004378	IPR	IPR019594	Ionotropic glutamate receptor, L-glutamate and glycine-binding domain	30	18	1	1x1		1		0.667	CTELE:8/10,HDUJA:8/13,PPACI:1/1,RVARI:1/4
	OG0004378	IPR	IPR001638	Solute-binding protein family 3/N-terminal domain of MltF	30	5					1x1	0.833	CTELE:1/10,HDUJA:1/13,ISCAP:1/1,PPACI:1/1,RVARI:1/4
	OG0004378	IPR	IPR001320	Ionotropic glutamate receptor	30	1						0.167	ISCAP:1/1
OG0005225	OG0005225	IPR	IPR000010	Cystatin domain	27	17	1	1x1		2	1x1,0	1	CTELE:1/1,DPULE:1/1,HDUJA:5/13,OBIMA:2/3,PCAUD:1/1,RVARI:4/5,SMARI:1/1,TSPIR:1/1,TURTI:1/1
OG0005434	OG0005434	IPR	IPR000726	Glycoside hydrolase, family 19, catalytic	26	18	1	1x1		1	1x1	0.833	HDUJA:11/17,NVITR:1/1,PMURR:1/1,PXYLO:1/1,RVARI:4/5
	OG0005434	IPR	IPR018392	LysM domain	26	8						0.5	CTELE:1/1,HDUJA:5/17,RVARI:2/5
	OG0005434	IPR	IPR001506	Peptidase M12A	26	1						0.167	HDUJA:1/17
	OG0005434	IPR	IPR000719	Protein kinase domain	26	1						0.167	RVARI:1/5
	OG0005434	IPR	IPR001828	Receptor, ligand binding region	26	1						0.167	RVARI:1/5
OG0005616	OG0005616	IPR	IPR001429	P2X purinoreceptor	25	25	1	1x1		1	1x1	1	CTELE:1/1,DPULE:2/2,HDUJA:10/10,ISCAP:1/1,OBIMA:1/1,PCAUD:1/1,PMURR:2/2,RVARI:6/6,SMARI:1/1
OG0006093	OG0006093	IPR	IPR000716	Thyroglobulin type-1	22	12	4	3x1		1	1x1	0.75	HDUJA:8/17,RVARI:3/3,TURTI:1/1
OG0006275	OG0006275	IPR	Manual	Secretary abundant heat soluble (CAHS)	21	0	3			3
OG0006451	OG0006451	IPR	IPR002018	Carboxylesterase, type B	20	17	4	4x1		1	1x1	1	HDUJA:10/12,PMURR:1/1,RVARI:6/7
OG0006846	OG0006846	IPR	None	None	18	0	3			1
OG0007871	OG0007871	IPR	IPR031481	Fucosyltransferase, N-terminal	13	1	1			1		0.5	HDUJA:1/9
	OG0007871	IPR	IPR000859	CUB domain	13	1						0.5	RVARI:1/4
	OG0007871	IPR	IPR001503	Glycosyl transferase family 10	13	1						0.5	HDUJA:1/9
OG0008155	OG0008155	IPR	IPR000922	D-galactoside/L-rhamnose binding SUEL lectin domain	12	7	1	1x1		3	1x1	1	HDUJA:5/8,RVARI:2/4
OG0009125	OG0009125	IPR	None	None	9	0	3			2
OG0011623	OG0011623	IPR	None	None	5	0	1			2
OG0011628	OG0011628	IPR	None	None	5	0	1			1
OG0012636	OG0012636	IPR	IPR001506	Peptidase M12A	4	3	1	1x1		1	1x1	1	HDUJA:2/3,RVARI:1/1
OG0014149	OG0014149	Manual	None	Cytosolic abundant heat soluble (CAHS)	3	0	1			1
OG0017536	OG0017536	IPR	None	None	2	0	1			1
OG0017538	OG0017538	IPR	None	None	2	0	1			1
OG0017602	OG0017602	IPR	None	None	2	0	1			1
OG0017751	OG0017751	IPR	None	None	2	0	1			1
OG0017756	OG0017756	IPR	IPR002542	Domain of unknown function DUF19	2	1	1			1	1x1	0.5	RVARI:1/1
OG0017812	OG0017812	IPR	None	None	2	0	1			1
OG0017818	OG0017818	IPR	None	None	2	0	1			1
OG0017819	OG0017819	IPR	None	None	2	0	1			1
OG0017872	OG0017872	IPR	IPR002350	Kazal domain	2	1	1			1	1x1	0.5	RVARI:1/1
